# Supplementary material for: Synthesis, crystal structure, fluorescence and antimicrobial activity of a series of rare-earth complexes based on indolebutyric acid
Source: Royal Society of Chemistry journal article supplement (doi:10.1039/c5ra19376a), 2015-01-01
Supplement: c5ra19376a1.pdf [file c5ra19376a1.pdf]

# **Synthesis, crystal structure, fluorescence and antimicrobial activity of a series of rare-earth complexes based on indolebutyric acid**

Zhi-Nan Wang,<sup>a</sup> Xue-Ting Xu,<sup>a</sup> Xiao Lv,<sup>b</sup> Feng-Ying Bai,<sup>a\*</sup> Shu-Qing Liu<sup>b\*</sup> and Yong-Heng Xing<sup>a</sup>

<sup>a</sup> College of Chemistry and Chemical Engineering, Liaoning Normal University, Dalian, 116029, P. R. China. E-mail: [baifengying2003@163.com](mailto:baifengying2003@163.com)

<sup>b</sup> Department of Biochemistry and Molecular Biology, Dalian Medical University, Dalian, 116044, P. R. China. E-mail: [Lsqsmz@163.com](mailto:Lsqsmz@163.com)

Table S1 the selected bond lengths (Å) and angles (°) of complexes **1-3**  
Table S2 the selected bond lengths (Å) and angles (°) of complexes **4-6**  
Table S3 the selected bond lengths (Å) and angles (°) of complexes **7-10**  
Table S4 Bond distances (Å) and Angles (°) of Hydrogen Bonds in Complexes **1-10\***  
Table S5 Detailed attribution of IR (cm<sup>-1</sup>) for complexes **6, 7, 8** and ligands  
Fig S1-S10 The IR spectra of complexes **1-10**  
Table S6 The UV-vis spectra assignments of complexes **1-10**  
Fig S11-S20 The UV-vis spectra of complexes **1-10**  
Fig S21-S23 Room-temperature solid-state photoluminescence spectrum of complexes **3, 5 and 8**  
Fig S24-S33 The TG curve of complexes **1-10**  
Fig S34-S43 The PXRD spectra of complexes **1-10**  
Fig S44-S63 The structure of complexes **1, 2, 3, 4, 5, 9 and 10**  
Fig S64-S79 The antimicrobial activity of complexes **1-10** against G.S, E.C, P.A and B.S

**Table S1** the selected bond lengths (Å) and angles (°) of complexes **1-3**

| Complex 1                      |            |                                |            |                                              |            |
|--------------------------------|------------|--------------------------------|------------|----------------------------------------------|------------|
| La-O5                          | 2.434(5)   | La-O4 <sup>#1</sup>            | 2.463(5)   | La-O6 <sup>#1</sup>                          | 2.484(5)   |
| La-O3                          | 2.562(6)   | La-O1                          | 2.585(5)   | La-O2                                        | 2.603(5)   |
| La-O4                          | 2.666(5)   | La-N1                          | 2.708(4)   | La-N2                                        | 2.727(4)   |
| O5-La-O4 <sup>#1</sup>         | 74.15(17)  | O5-La-O6 <sup>#1</sup>         | 135.80(16) | O4 <sup>#1</sup> -La-O6 <sup>#1</sup>        | 74.94(2)   |
| O5-La-O3                       | 78.8(2)    | O4 <sup>#1</sup> -La-O3        | 123.90(17) | O6 <sup>#1</sup> -La-O3                      | 93.3(2)    |
| O5-La-O1                       | 75.78(17)  | O4 <sup>#1</sup> -La-O1        | 75.51(17)  | O6 <sup>#1</sup> -La-O1                      | 124.90(17) |
| O3-La-O1                       | 141.7(2)   | O5-La-O2                       | 125.80(17) | O4 <sup>#1</sup> -La-O2                      | 91.46(17)  |
| O6 <sup>#1</sup> -La-O2        | 85.59(17)  | O3-La-O2                       | 143.08(19) | O1-La-O2                                     | 50.04(16)  |
| O5-La-O4                       | 69.75(17)  | O4 <sup>#1</sup> -La-O4        | 75.12(17)  | O6 <sup>#1</sup> -La-O4                      | 72.31(16)  |
| O3-La-O4                       | 49.43(16)  | O1-La-O4                       | 139.47(16) | O2-La-O4                                     | 156.39(15) |
| O5-La-N1                       | 80.77(14)  | O4 <sup>#1</sup> -La-N1        | 140.70(14) | O6 <sup>#1</sup> -La-N1                      | 140.74(14) |
| O3-La-N1                       | 78.74(16)  | O1-La-N1                       | 69.23(14)  | O2-La-N1                                     | 79.14(14)  |
| O4-La-N1                       | 123.42(13) | O5-La-N2                       | 134.39(15) | O4 <sup>#1</sup> -La-N2                      | 151.46(14) |
| O6 <sup>#1</sup> -La-N2        | 80.42(14)  | O3-La-N2                       | 71.13(16)  | O1-La-N2                                     | 108.33(14) |
| O2-La-N2                       | 72.31(14)  | O4-La-N2                       | 110.87(13) | N1-La-N2                                     | 60.55(8)   |
| Complex 2                      |            |                                |            |                                              |            |
| Pr(1)-O(5)                     | 2.388(3)   | Pr(1)-O(4) <sup>#1</sup>       | 2.422(3)   | Pr(1)-O(6) <sup>#1</sup>                     | 2.445(3)   |
| Pr(1)-O(3)                     | 2.521(4)   | Pr(1)-O(2)                     | 2.546(3)   | Pr(1)-O(1)                                   | 2.559(3)   |
| Pr(1)-O(4)                     | 2.627(3)   | Pr(1)-N(1)                     | 2.646(4)   | Pr(1)-N(2)                                   | 2.687(4)   |
| O(5)-Pr(1)-O(4) <sup>#1</sup>  | 74.44(12)  | O(5)-Pr(1)-O(6) <sup>#1</sup>  | 136.43(11) | O(4) <sup>#1</sup> -Pr(1)-O(6) <sup>#1</sup> | 75.25(11)  |
| O(5)-Pr(1)-O(3)                | 79.33(14)  | O(4) <sup>#1</sup> -Pr(1)-O(3) | 124.38(11) | O(6) <sup>#1</sup> -Pr(1)-O(3)               | 92.96(14)  |
| O(5)-Pr(1)-O(2)                | 75.21(11)  | O(4) <sup>#1</sup> -Pr(1)-O(2) | 74.99(11)  | O(6) <sup>#1</sup> -Pr(1)-O(2)               | 124.99(12) |
| O(3)-Pr(1)-O(2)                | 141.86(14) | O(5)-Pr(1)-O(1)                | 126.09(12) | O(4) <sup>#1</sup> -Pr(1)-O(1)               | 91.79(11)  |
| O(6) <sup>#1</sup> -Pr(1)-O(1) | 85.23(12)  | O(3)-Pr(1)-O(1)                | 142.11(12) | O(2)-Pr(1)-O(1)                              | 50.93(11)  |
| O(5)-Pr(1)-O(4)                | 69.90(11)  | O(4) <sup>#1</sup> -Pr(1)-O(4) | 74.88(11)  | O(6) <sup>#1</sup> -Pr(1)-O(4)               | 72.47(11)  |
| O(3)-Pr(1)-O(4)                | 50.07(10)  | O(2)-Pr(1)-O(4)                | 138.66(10) | O(1)-Pr(1)-O(4)                              | 156.21(11) |
| O(5)-Pr(1)-N(1)                | 80.30(12)  | O(4) <sup>#1</sup> -Pr(1)-N(1) | 140.64(12) | O(6) <sup>#1</sup> -Pr(1)-N(1)               | 140.52(12) |
| O(3)-Pr(1)-N(1)                | 78.51(13)  | O(2)-Pr(1)-N(1)                | 69.63(13)  | O(1)-Pr(1)-N(1)                              | 79.20(13)  |
| O(4)-Pr(1)-N(1)                | 123.50(12) | O(5)-Pr(1)-N(2)                | 134.58(12) | O(4) <sup>#1</sup> -Pr(1)-N(2)               | 150.97(12) |
| O(6) <sup>#1</sup> -Pr(1)-N(2) | 79.44(11)  | O(3)-Pr(1)-N(2)                | 70.49(13)  | O(2)-Pr(1)-N(2)                              | 109.42(11) |
| O(1)-Pr(1)-N(2)                | 71.99(12)  | O(4)-Pr(1)-N(2)                | 110.73(11) | N(1)-Pr(1)-N(2)                              | 61.30(12)  |
| Complex 3                      |            |                                |            |                                              |            |
| Eu(1)-O(6)                     | 2.337(4)   | Eu(1)-O(3) <sup>#1</sup>       | 2.356(3)   | Eu(1)-O(5) <sup>#1</sup>                     | 2.393(3)   |
| Eu(1)-O(4)                     | 2.464(6)   | Eu(1)-O(1)                     | 2.506(4)   | Eu(1)-O(2)                                   | 2.507(4)   |
| Eu(1)-N(2)                     | 2.596(4)   | Eu(1)-O(3)                     | 2.589(4)   | Eu(1)-N(1)                                   | 2.628(4)   |
| O(6)-Eu(1)-O(3) <sup>#1</sup>  | 74.92(12)  | O(6)-Eu(1)-O(5) <sup>#1</sup>  | 136.97(12) | O(3) <sup>#1</sup> -Eu(1)-O(5) <sup>#1</sup> | 75.20(12)  |
| O(6)-Eu(1)-O(4)                | 78.90(14)  | O(3) <sup>#1</sup> -Eu(1)-O(4) | 124.61(13) | O(5) <sup>#1</sup> -Eu(1)-O(4)               | 93.58(14)  |

|                                |            |                                |            |                                |            |
|--------------------------------|------------|--------------------------------|------------|--------------------------------|------------|
| O(6)-Eu(1)-O(1)                | 126.88(12) | O(3) <sup>#1</sup> -Eu(1)-O(1) | 91.95(13)  | O(5) <sup>#1</sup> -Eu(1)-O(1) | 84.26(12)  |
| O(4)-Eu(1)-O(1)                | 141.62(14) | O(6)-Eu(1)-O(2)                | 75.36(13)  | O(3) <sup>#1</sup> -Eu(1)-O(2) | 75.01(12)  |
| O(5) <sup>#1</sup> -Eu(1)-O(2) | 124.64(12) | O(4)-Eu(1)-O(2)                | 141.56(14) | O(1)-Eu(1)-O(2)                | 51.59(12)  |
| O(6)-Eu(1)-N(2)                | 79.60(13)  | O(3) <sup>#1</sup> -Eu(1)-N(2) | 140.69(13) | O(5)-Eu(1)-N(2)                | 140.63(13) |
| O(4)-Eu(1)-N(2)                | 77.83(14)  | O(1)-Eu(1)-N(2)                | 79.92(14)  | O(2)-Eu(1)-N(2)                | 69.86(13)  |
| O(6)-Eu(1)-O(3)                | 70.01(12)  | O(3) <sup>#1</sup> -Eu(1)-O(3) | 74.24(13)  | O(5) <sup>#1</sup> -Eu(1)-O(3) | 72.53(12)  |
| O(4)-Eu(1)-O(3)                | 51.00(12)  | O(1)-Eu(1)-O(3)                | 155.27(12) | O(2)-Eu(1)-O(3)                | 138.35(12) |
| N(2)-Eu(1)-O(3)                | 123.68(13) | O(6)-Eu(1)-N(1)                | 134.84(13) | O(3) <sup>#1</sup> -Eu(1)-N(1) | 150.19(13) |
| O(5)-Eu(1)-N(1)                | 78.35(13)  | O(4)-Eu(1)-N(1)                | 70.25(14)  | O(1)-Eu(1)-N(1)                | 71.81(13)  |
| O(2)-Eu(1)-N(1)                | 110.21(13) | N(2)-Eu(1)-N(1)                | 62.51(14)  | O(3)-Eu(1)-N(1)                | 110.50(12) |

Complex 1: #1 -x,-y+1,-z+2; complex 2: #1 -x+2,-y,-z+1; complex 3: #1: -x+2,-y+1,-z+1

**Table S2** the selected bond lengths (Å) and angles (°) of complexes 4-6

| Complex 4                                    |           |                                |            |                                              |          |
|----------------------------------------------|-----------|--------------------------------|------------|----------------------------------------------|----------|
| Gd(1)-O(5)                                   | 2.340(7)  | Gd(1)-O(4) <sup>#1</sup>       | 2.347(6)   | Gd(1)-O(6) <sup>#1</sup>                     | 2.382(5) |
| Gd(1)-O(3)                                   | 2.465(7)  | Gd(1)-O(1)                     | 2.490(6)   | Gd(1)-O(2)                                   | 2.499(6) |
| Gd(1)-O(4)                                   | 2.581(5)  | Gd(1)-N(2)                     | 2.584(6)   | Gd(1)-N(1)                                   | 2.636(9) |
| O(5)-Gd(1)-O(4) <sup>#1</sup>                | 74.7(2)   | O(5)-Gd(1)-O(6) <sup>#1</sup>  | 137.3(2)   | O(4) <sup>#1</sup> -Gd(1)-O(6) <sup>#1</sup> | 75.2(2)  |
| O(5)-Gd(1)-O(3)                              | 79.1(3)   | O(4) <sup>#1</sup> -Gd(1)-O(3) | 124.7(2)   | O(6) <sup>#1</sup> -Gd(1)-O(3)               | 94.0(2)  |
| O(5)-Gd(1)-O(1)                              | 126.5(2)  | O(4) <sup>#1</sup> -Gd(1)-O(1) | 91.9(2)    | O(6) <sup>#1</sup> -Gd(1)-O(1)               | 84.1(2)  |
| O(3)-Gd(1)-O(1)                              | 141.7(3)  | O(5)-Gd(1)-O(2)                | 74.5(2)    | O(4) <sup>#1</sup> -Gd(1)-O(2)               | 74.8(2)  |
| O(6) <sup>#1</sup> -Gd(1)-O(2)               | 124.7(2)  | O(3)-Gd(1)-O(2)                | 141.1(3)   | O(1)-Gd(1)-O(2)                              | 52.0(2)  |
| O(5)-Gd(1)-O(4)                              | 70.5(2)   | O(4) <sup>#1</sup> -Gd(1)-O(4) | 73.9(2)    | O(6) <sup>#1</sup> -Gd(1)-O(4)               | 72.4(2)  |
| O(3)-Gd(1)-O(4)                              | 51.49(19) | O(1)-Gd(1)-O(4)                | 154.87(18) | O(2)-Gd(1)-O(4)                              | 137.8(2) |
| O(5)-Gd(1)-N(2)                              | 78.9(2)   | O(4) <sup>#1</sup> -Gd(1)-N(2) | 140.1(2)   | O(6) <sup>#1</sup> -Gd(1)-N(2)               | 141.2(3) |
| O(3)-Gd(1)-N(2)                              | 77.7(2)   | O(1)-Gd(1)-N(2)                | 80.2(2)    | O(2)-Gd(1)-N(2)                              | 69.6(2)  |
| O(4)-Gd(1)-N(2)                              | 123.9(2)  | O(5)-Gd(1)-N(1)                | 134.9(2)   | O(4) <sup>#1</sup> -Gd(1)-N(1)               | 150.3(2) |
| O(6) <sup>#1</sup> -Gd(1)-N(1)               | 78.0(2)   | O(3)-Gd(1)-N(1)                | 69.7(3)    | O(1)-Gd(1)-N(1)                              | 72.7(2)  |
| O(2)-Gd(1)-N(1)                              | 111.3(2)  | O(4)-Gd(1)-N(1)                | 109.9(2)   | N(2)-Gd(1)-N(1)                              | 63.5(2)  |
| Complex 5                                    |           |                                |            |                                              |          |
| Tb(1)-O(6) <sup>#1</sup>                     | 2.324(7)  | Tb(1)-O(3) <sup>#1</sup>       | 2.333(7)   | Tb(1)-O(5)                                   | 2.353(6) |
| Tb(1)-O(4)                                   | 2.439(8)  | Tb(1)-O(1)                     | 2.446(6)   | Tb(1)-O(2)                                   | 2.491(7) |
| Tb(1)-N(2)                                   | 2.562(8)  | Tb(1)-O(3)                     | 2.594(9)   | Tb(1)-N(1)                                   | 2.596(6) |
| O(6) <sup>#1</sup> -Tb(1)-O(3) <sup>#1</sup> | 75.3(2)   | O(6) <sup>#1</sup> -Tb(1)-O(5) | 137.9(2)   | O(3) <sup>#1</sup> -Tb(1)-O(5)               | 75.5(2)  |
| O(6) <sup>#1</sup> -Tb(1)-O(4)               | 79.2(3)   | O(3) <sup>#1</sup> -Tb(1)-O(4) | 125.6(2)   | O(5)-Tb(1)-O(4)                              | 94.1(2)  |
| O(6) <sup>#1</sup> -Tb(1)-O(1)               | 127.1(2)  | O(3) <sup>#1</sup> -Tb(1)-O(1) | 91.4(2)    | O(5)-Tb(1)-O(1)                              | 83.2(2)  |
| O(4)-Tb(1)-O(1)                              | 141.0(3)  | O(6) <sup>#1</sup> -Tb(1)-O(2) | 74.8(2)    | O(3) <sup>#1</sup> -Tb(1)-O(2)               | 73.9(2)  |
| O(5)-Tb(1)-O(2)                              | 124.1(2)  | O(4)-Tb(1)-O(2)                | 141.6(2)   | O(1)-Tb(1)-O(2)                              | 52.4(2)  |
| O(6) <sup>#1</sup> -Tb(1)-N(2)               | 79.1(3)   | O(3) <sup>#1</sup> -Tb(1)-N(2) | 140.0(2)   | O(5)-Tb(1)-N(2)                              | 140.5(3) |
| O(4)-Tb(1)-N(2)                              | 77.9(2)   | O(1)-Tb(1)-N(2)                | 79.9(2)    | O(2)-Tb(1)-N(2)                              | 69.9(3)  |
| O(6) <sup>#1</sup> -Tb(1)-O(3)               | 70.3(2)   | O(3) <sup>#1</sup> -Tb(1)-O(3) | 74.7(2)    | O(5)-Tb(1)-O(3)                              | 73.2(2)  |
| O(4)-Tb(1)-O(3)                              | 51.6(2)   | O(1)-Tb(1)-O(3)                | 154.9(2)   | O(2)-Tb(1)-O(3)                              | 137.7(2) |
| N(2)-Tb(1)-O(3)                              | 124.1(2)  | O(6) <sup>#1</sup> -Tb(1)-N(1) | 135.3(3)   | O(3) <sup>#1</sup> -Tb(1)-N(1)               | 149.3(2) |

|                         |           |                         |           |                                       |           |
|-------------------------|-----------|-------------------------|-----------|---------------------------------------|-----------|
| O(5)-Tb(1)-N(1)         | 76.9(2)   | O(4)-Tb(1)-N(1)         | 69.4(3)   | O(1)-Tb(1)-N(1)                       | 72.2(3)   |
| O(2)-Tb(1)-N(1)         | 112.0(2)  | N(2)-Tb(1)-N(1)         | 64.1(3)   | O(3)-Tb(1)-N(1)                       | 109.6(2)  |
| Complex 6               |           |                         |           |                                       |           |
| Yb-O5                   | 2.253(2)  | Yb-O4 <sup>#1</sup>     | 2.274(2)  | Yb-O6 <sup>#1</sup>                   | 2.307(2)  |
| Yb-O3                   | 2.368(2)  | Yb-O2                   | 2.411(2)  | Yb-O1                                 | 2.457(2)  |
| Yb-N1                   | 2.507(3)  | Yb-N2                   | 2.562(3)  | Yb-O4                                 | 2.573(2)  |
| O5-Yb-O4 <sup>#1</sup>  | 75.53(9)  | O5-Yb-O6 <sup>#1</sup>  | 137.32(8) | O4 <sup>#1</sup> -Yb-O6 <sup>#1</sup> | 75.85(8)  |
| O5-Yb-O3                | 78.98(10) | O4 <sup>#1</sup> -Yb-O3 | 124.98(8) | O6 <sup>#1</sup> -Yb-O3               | 92.43(10) |
| O5-Yb-O2                | 127.89(8) | O4 <sup>#1</sup> -Yb-O2 | 91.37(9)  | O6 <sup>#1</sup> -Yb-O2               | 83.63(9)  |
| O3-Yb-O2                | 141.36(8) | O5-Yb-O1                | 74.84(8)  | O4 <sup>#1</sup> -Yb-O1               | 74.09(8)  |
| O6 <sup>#1</sup> -Yb-O1 | 125.48(9) | O3-Yb-O1                | 141.93(9) | O2-Yb-O1                              | 53.13(8)  |
| O5-Yb-N1                | 78.45(9)  | O4 <sup>#1</sup> -Yb-N1 | 139.72(9) | O6 <sup>#1</sup> -Yb-N1               | 141.07(8) |
| O3-Yb-N1                | 78.38(9)  | O2-Yb-N1                | 80.93(9)  | O1-Yb-N1                              | 69.71(9)  |
| O5-Yb-N2                | 135.19(9) | O4 <sup>#1</sup> -Yb-N2 | 149.15(9) | O6 <sup>#1</sup> -Yb-N2               | 76.64(8)  |
| O3-Yb-N2                | 69.79(9)  | O2-Yb-N2                | 71.91(9)  | O1-Yb-N2                              | 112.02(8) |
| N1-Yb-N2                | 64.63(9)  | O5-Yb-O4                | 69.81(8)  | O4 <sup>#1</sup> -Yb-O4               | 73.83(9)  |
| O6 <sup>#1</sup> -Yb-O4 | 72.22(8)  | O3-Yb-O4                | 51.67(8)  | O2-Yb-O4                              | 154.01(8) |
| O1-Yb-O4                | 136.88(9) | N1-Yb-O4                | 124.12(8) | N2-Yb-O4                              | 110.35(8) |

Complex 4: #1: -x+1,-y+2,-z+2; complex 5: #1: -x+2,-y+2,-z; complex 6: #1: 1-x, 1-y, 1-z

**Table S3** the selected bond lengths (Å) and angles (°) of complexes **7-10**

|                                              |            |                                |            |                                |            |
|----------------------------------------------|------------|--------------------------------|------------|--------------------------------|------------|
| Complex 7                                    |            |                                |            |                                |            |
| Sm(1)-O(2) <sup>#1</sup>                     | 2.350(4)   | Sm(1)-O(4) <sup>#1</sup>       | 2.372(4)   | Sm(1)-O(1)                     | 2.392(4)   |
| Sm(1)-O(3)                                   | 2.483(4)   | Sm(1)-O(4)                     | 2.588(4)   | Sm(1)-N(3)                     | 2.621(5)   |
| Sm(1)-N(2)                                   | 2.658(5)   | Sm(1)-N(1)                     | 2.665(5)   | Sm(1)-N(4)                     | 2.666(5)   |
| O(2) <sup>#1</sup> -Sm(1)-O(4) <sup>#1</sup> | 76.47(13)  | O(2) <sup>#1</sup> -Sm(1)-O(1) | 138.79(13) | O(4) <sup>#1</sup> -Sm(1)-O(1) | 74.85(14)  |
| O(2) <sup>#1</sup> -Sm(1)-O(3)               | 96.35(15)  | O(4) <sup>#1</sup> -Sm(1)-O(3) | 125.86(14) | O(1)-Sm(1)-O(3)                | 77.63(14)  |
| O(2) <sup>#1</sup> -Sm(1)-O(4)               | 71.13(13)  | O(4) <sup>#1</sup> -Sm(1)-O(4) | 76.77(15)  | O(1)-Sm(1)-O(4)                | 73.93(13)  |
| O(3)-Sm(1)-O(4)                              | 51.00(13)  | O(2) <sup>#1</sup> -Sm(1)-N(3) | 137.12(14) | O(4) <sup>#1</sup> -Sm(1)-N(3) | 141.48(14) |
| O(1)-Sm(1)-N(3)                              | 81.78(14)  | O(3)-Sm(1)-N(3)                | 76.61(15)  | O(4)-Sm(1)-N(3)                | 125.41(14) |
| O(2) <sup>#1</sup> -Sm(1)-N(2)               | 124.03(16) | O(4) <sup>#1</sup> -Sm(1)-N(2) | 74.86(15)  | O(1)-Sm(1)-N(2)                | 75.30(15)  |
| O(3)-Sm(1)-N(2)                              | 139.18(15) | O(4)-Sm(1)-N(2)                | 142.47(14) | N(3)-Sm(1)-N(2)                | 69.78(16)  |
| O(2) <sup>#1</sup> -Sm(1)-N(1)               | 74.50(15)  | O(4) <sup>#1</sup> -Sm(1)-N(1) | 94.09(15)  | O(1)-Sm(1)-N(1)                | 136.23(15) |
| O(3)-Sm(1)-N(1)                              | 136.29(15) | O(4)-Sm(1)-N(1)                | 145.61(14) | N(3)-Sm(1)-N(1)                | 81.98(16)  |
| N(2)-Sm(1)-N(1)                              | 60.96(15)  | O(2) <sup>#1</sup> -Sm(1)-N(4) | 75.52(14)  | O(4) <sup>#1</sup> -Sm(1)-N(4) | 149.76(15) |
| O(1)-Sm(1)-N(4)                              | 135.07(15) | O(3)-Sm(1)-N(4)                | 68.78(15)  | O(4)-Sm(1)-N(4)                | 104.43(14) |
| N(3)-Sm(1)-N(4)                              | 62.39(15)  | N(2)-Sm(1)-N(4)                | 112.48(15) | N(1)-Sm(1)-N(4)                | 67.55(16)  |
| Complex 8                                    |            |                                |            |                                |            |

|                                              |            |                                |            |                                |            |
|----------------------------------------------|------------|--------------------------------|------------|--------------------------------|------------|
| Eu(1)-O(6) <sup>#1</sup>                     | 2.355(3)   | Eu(1)-O(4) <sup>#1</sup>       | 2.377(3)   | Eu(1)-O(5)                     | 2.401(3)   |
| Eu(1)-O(1)                                   | 2.441(3)   | Eu(1)-O(3)                     | 2.488(3)   | Eu(1)-O(2)                     | 2.547(3)   |
| Eu(1)-N(2)                                   | 2.618(4)   | Eu(1)-O(4)                     | 2.618(3)   | Eu(1)-N(1)                     | 2.621(3)   |
| O(6) <sup>#1</sup> -Eu(1)-O(4) <sup>#1</sup> | 74.34(9)   | O(6) <sup>#1</sup> -Eu(1)-O(5) | 136.02(9)  | O(4) <sup>#1</sup> -Eu(1)-O(5) | 77.34(9)   |
| O(6) <sup>#1</sup> -Eu(1)-O(1)               | 76.51(10)  | O(4) <sup>#1</sup> -Eu(1)-O(1) | 81.46(10)  | O(5)-Eu(1)-O(1)                | 131.16(10) |
| O(6) <sup>#1</sup> -Eu(1)-O(3)               | 87.58(10)  | O(4) <sup>#1</sup> -Eu(1)-O(3) | 125.43(9)  | O(5)-Eu(1)-O(3)                | 82.16(10)  |
| O(1)-Eu(1)-O(3)                              | 143.90(10) | O(6) <sup>#1</sup> -Eu(1)-O(2) | 125.97(10) | O(4) <sup>#1</sup> -Eu(1)-O(2) | 81.27(10)  |
| O(5)-Eu(1)-O(2)                              | 81.03(10)  | O(1)-Eu(1)-O(2)                | 52.37(10)  | O(3)-Eu(1)-O(2)                | 143.88(10) |
| O(6) <sup>#1</sup> -Eu(1)-N(2)               | 137.87(10) | O(4) <sup>#1</sup> -Eu(1)-N(2) | 147.27(11) | O(5)-Eu(1)-N(2)                | 78.28(10)  |
| O(1)-Eu(1)-N(2)                              | 98.77(11)  | O(3)-Eu(1)-N(2)                | 71.78(11)  | O(2)-Eu(1)-N(2)                | 73.62(11)  |
| O(6) <sup>#1</sup> -Eu(1)-O(4)               | 69.31(9)   | O(4) <sup>#1</sup> -Eu(1)-O(4) | 74.76(10)  | O(5)-Eu(1)-O(4)                | 71.21(9)   |
| O(1)-Eu(1)-O(4)                              | 142.39(10) | O(3)-Eu(1)-O(4)                | 50.75(9)   | O(2)-Eu(1)-O(4)                | 146.49(9)  |
| N(2)-Eu(1)-O(4)                              | 116.97(10) | O(6) <sup>#1</sup> -Eu(1)-N(1) | 76.27(10)  | O(4) <sup>#1</sup> -Eu(1)-N(1) | 144.03(10) |
| O(5)-Eu(1)-N(1)                              | 138.58(11) | O(1)-Eu(1)-N(1)                | 71.86(11)  | O(3)-Eu(1)-N(1)                | 72.97(10)  |
| O(2)-Eu(1)-N(1)                              | 100.01(11) | N(2)-Eu(1)-N(1)                | 62.84(11)  | O(4)-Eu(1)-N(1)                | 113.16(10) |

**Complex 9**

|                                       |            |                         |            |                         |            |
|---------------------------------------|------------|-------------------------|------------|-------------------------|------------|
| Tb-O6 <sup>#1</sup>                   | 2.326(4)   | Tb-O4 <sup>#1</sup>     | 2.355(4)   | Tb-O5                   | 2.372(4)   |
| Tb-O2                                 | 2.423(4)   | Tb-O3                   | 2.459(4)   | Tb-O1                   | 2.522(4)   |
| Tb-N1                                 | 2.582(4)   | Tb-N2                   | 2.601(4)   | Tb-O4                   | 2.616(4)   |
| O6 <sup>#1</sup> -Tb-O4 <sup>#1</sup> | 74.57(13)  | O6 <sup>#1</sup> -Tb-O5 | 136.19(12) | O4 <sup>#1</sup> -Tb-O5 | 77.44(12)  |
| O6 <sup>#1</sup> -Tb-O2               | 76.72(14)  | O4 <sup>#1</sup> -Tb-O2 | 81.35(13)  | O5-Tb-O2                | 131.00(14) |
| O6 <sup>#1</sup> -Tb-O3               | 87.33(14)  | O4 <sup>#1</sup> -Tb-O3 | 125.94(12) | O5-Tb-O3                | 82.55(13)  |
| O2-Tb-O3                              | 143.54(14) | O6 <sup>#1</sup> -Tb-O1 | 126.20(14) | O4 <sup>#1</sup> -Tb-O1 | 80.47(13)  |
| O5-Tb-O1                              | 80.38(14)  | O2-Tb-O1                | 52.65(14)  | O3-Tb-O1                | 144.07(14) |
| O6 <sup>#1</sup> -Tb-N1               | 138.27(14) | O4 <sup>#1</sup> -Tb-N1 | 146.52(14) | O5-Tb-N1                | 77.98(14)  |
| O2-Tb-N1                              | 98.24(15)  | O3-Tb-N1                | 72.35(14)  | O1-Tb-N1                | 73.28(15)  |
| O6 <sup>#1</sup> -Tb-N2               | 75.93(13)  | O4 <sup>#1</sup> -Tb-N2 | 143.43(14) | O5-Tb-N2                | 139.05(14) |
| O2-Tb-N2                              | 71.19(15)  | O3-Tb-N2                | 73.22(14)  | O1-Tb-N2                | 100.35(14) |
| N1-Tb-N2                              | 63.56(15)  | O6 <sup>#1</sup> -Tb-O4 | 69.41(12)  | O4 <sup>#1</sup> -Tb-O4 | 74.98(14)  |
| O5-Tb-O4                              | 71.21(12)  | O2-Tb-O4                | 142.64(13) | O3-Tb-O4                | 51.02(12)  |
| O1-Tb-O4                              | 145.69(12) | N1-Tb-O4                | 117.41(14) | N2-Tb-O4                | 113.66(13) |

**Complex 10**

|                         |          |                                       |          |                         |          |
|-------------------------|----------|---------------------------------------|----------|-------------------------|----------|
| Yb-O5                   | 2.256(7) | Yb-O4 <sup>#1</sup>                   | 2.258(6) | Yb-O3                   | 2.293(7) |
| Yb-O6 <sup>#1</sup>     | 2.273(6) | Yb-O1                                 | 2.417(6) | Yb-O2                   | 2.475(6) |
| Yb-N2                   | 2.484(9) | Yb-N1                                 | 2.541(7) |                         |          |
| O5-Yb-O4 <sup>#1</sup>  | 81.4(3)  | O5-Yb-O3                              | 73.4(2)  | O4 <sup>#1</sup> -Yb-O3 | 126.8(3) |
| O5-Yb-O6 <sup>#1</sup>  | 127.2(2) | O4 <sup>#1</sup> -Yb-O6 <sup>#1</sup> | 76.2(2)  | O3-Yb-O6 <sup>#1</sup>  | 83.0(3)  |
| O5-Yb-O1                | 95.0(2)  | O4 <sup>#1</sup> -Yb-O1               | 148.5(2) | O3-Yb-O1                | 80.9(2)  |
| O6 <sup>#1</sup> -Yb-O1 | 127.3(2) | O5-Yb-O2                              | 137.5(2) | O4 <sup>#1</sup> -Yb-O2 | 140.7(3) |

|                         |          |                         |         |          |          |
|-------------------------|----------|-------------------------|---------|----------|----------|
| O3-Yb-O2                | 73.8(2)  | O6 <sup>#1</sup> -Yb-O2 | 73.9(2) | O1-Yb-O2 | 53.5(2)  |
| O5-Yb-N2                | 137.8(2) | O4 <sup>#1</sup> -Yb-N2 | 79.1(3) | O3-Yb-N2 | 146.2(2) |
| O6 <sup>#1</sup> -Yb-N2 | 83.3(3)  | O1-Yb-N2                | 83.2(2) | O2-Yb-N2 | 72.8(2)  |
| O5-Yb-N1                | 73.9(3)  | O4 <sup>#1</sup> -Yb-N1 | 74.5(2) | O3-Yb-N1 | 136.7(3) |
| O6 <sup>#1</sup> -Yb-N1 | 140.0(3) | O1-Yb-N1                | 74.5(2) | O2-Yb-N1 | 115.4(2) |
| N2-Yb-N1                | 65.0(3)  |                         |         |          |          |

Complex 7: #1 -x,-y,-z+1; complex 8: #1 -x,-y,-z+1; complex 9: #1 1-x, 1-y, 1-z; complex 10: #1 -x+1,-y+1,-z

**Table S4** Bond distances (Å) and Angles (°) of Hydrogen Bonds in Complexes **1-10\***

| D-H...A                     | d (D-H) Å | d (H...A) Å | d (D...A) Å | ∠DHA(°) |
|-----------------------------|-----------|-------------|-------------|---------|
| Complex 1                   |           |             |             |         |
| N3-H3A...O9 <sup>#2</sup>   | 0.86      | 2.19        | 3.027       | 164.3   |
| N5-H5A...O1W <sup>#3</sup>  | 0.86      | 2.02        | 2.825(11)   | 155.8   |
| N7-H7A...O2                 | 0.86      | 1.95        | 2.705(8)    | 146.7   |
| O1W-H1A...O1 <sup>#4</sup>  | 0.822(10) | 2.03(4)     | 2.816(9)    | 161(9)  |
| O1W-H1B...O7                | 0.823(10) | 2.31(8)     | 2.987(15)   | 140(11) |
| O10-H10B...O8 <sup>#5</sup> | 0.82      | 2.29        | 3.02(3)     | 147.3   |
| C10-H10A...O6 <sup>#6</sup> | 0.93      | 2.59        | 3.272(10)   | 130.1   |
| C56-H56A...O7 <sup>#7</sup> | 0.93      | 2.55        | 3.307(13)   | 139.3   |
| Complex 2                   |           |             |             |         |
| O2W-H2WA...O8               | 0.85      | 2.25        | 2.989(10)   | 144.9   |
| O2W-H2WC...O2 <sup>#2</sup> | 0.85      | 2.05        | 2.856(5)    | 157.1   |
| O1W-H1WA...O7 <sup>#3</sup> | 0.85      | 2.33        | 3.119(15)   | 155.5   |
| N3-H3A...O9 <sup>#4</sup>   | 0.86      | 2.15        | 2.992(10)   | 165.0   |
| N4-H4A...N3 <sup>#2</sup>   | 0.86      | 2.38        | 3.199(8)    | 160.5   |
| N5-H5...O2W <sup>#5</sup>   | 0.86      | 2.01        | 2.809(6)    | 154.4   |
| N7-H7...O1 <sup>#6</sup>    | 0.86      | 1.96        | 2.714(5)    | 146.3   |
| C6-H6C...O3 <sup>#6</sup>   | 0.93      | 2.56        | 3.254(6)    | 131.8   |
| C56-H56A...O8               | 0.93      | 2.55        | 3.298(9)    | 138.2   |
| Complex 3                   |           |             |             |         |
| O1W-H1A...O7                | 0.822(10) | 2.220(14)   | 3.041(10)   | 176(8)  |
| O2W-H2WB...O8               | 0.85      | 2.56        | 3.133(12)   | 125.7   |
| N3-H3...O9 <sup>#2</sup>    | 0.86      | 2.18        | 3.024(9)    | 165.9   |
| N5-H5...O1W <sup>#3</sup>   | 0.86      | 2.02        | 2.829(8)    | 156.6   |
| N7-H7...O1 <sup>#4</sup>    | 0.94(6)   | 1.89(7)     | 2.722(6)    | 147(6)  |
| C56-H56A...O7 <sup>#5</sup> | 0.93      | 2.55        | 3.319(10)   | 140.5   |

| Complex 4                   |      |      |           |       |
|-----------------------------|------|------|-----------|-------|
| O1W-H1WA...O7 <sup>#2</sup> | 0.85 | 2.45 | 3.060(18) | 129.1 |
| N3-H3A...O9 <sup>#3</sup>   | 0.86 | 2.16 | 2.995(17) | 164.3 |
| N5-H5A...O1W <sup>#4</sup>  | 0.86 | 2.02 | 2.834(15) | 158.1 |
| N6-H6...O1 <sup>#5</sup>    | 0.86 | 1.98 | 2.740(12) | 146.1 |
| C51-H51A...O7               | 0.93 | 2.55 | 3.32(2)   | 140.4 |
| Complex 5                   |      |      |           |       |
| N3-H3A...O7 <sup>#2</sup>   | 0.86 | 2.17 | 3.006(16) | 165.5 |
| N5-H5A...O2W                | 0.86 | 1.99 | 2.822(14) | 162.3 |
| N7-H7...O1                  | 0.86 | 2.00 | 2.745(12) | 145.1 |
| C56-H56A...O9               | 0.93 | 2.56 | 3.332(18) | 141.1 |
| Complex 6                   |      |      |           |       |
| N3-H3A...O9 <sup>#2</sup>   | 0.86 | 2.18 | 3.018(7)  | 165.9 |
| N5-H5A...O1W <sup>#3</sup>  | 0.86 | 1.99 | 2.809(5)  | 158.5 |
| N7-H7...O2                  | 0.86 | 1.99 | 2.733(4)  | 144.8 |
| C56-H56A...O7 <sup>#4</sup> | 0.93 | 2.53 | 3.318(7)  | 142.4 |
| Complex 7                   |      |      |           |       |
| N5-H5A...O6 <sup>#2</sup>   | 0.86 | 2.12 | 2.965(10) | 165.5 |
| N6-H6A...O6 <sup>#3</sup>   | 0.86 | 2.12 | 2.944(10) | 159.9 |
| C17-H17A...O3 <sup>#4</sup> | 0.93 | 2.59 | 3.304(9)  | 134.3 |
| Complex 8                   |      |      |           |       |
| N3-H3A...O3 <sup>#2</sup>   | 0.86 | 2.05 | 2.863(5)  | 158   |
| N4-H4A...O2 <sup>#3</sup>   | 0.86 | 2.17 | 2.983(5)  | 158   |
| Complex 9                   |      |      |           |       |
| N3-H3A...O3 <sup>#2</sup>   | 0.86 | 2.05 | 2.857(3)  | 157   |
| N4-H4A...O1 <sup>#3</sup>   | 0.86 | 2.17 | 2.976(3)  | 157   |
| Complex 10                  |      |      |           |       |
| N4-H4A...O2 <sup>#2</sup>   | 0.86 | 2.36 | 3.015(9)  | 133.6 |
| N5-H5A...O1 <sup>#3</sup>   | 0.86 | 2.03 | 2.828(11) | 153.2 |
| C30-H30A...O3 <sup>#4</sup> | 0.93 | 2.46 | 3.342(11) | 159.2 |

\*Symmetry transformation used to generate equivalent atoms: For complex 1: #2: x, y-1, z #3: x-1, y-1, z+1 #4: 1-x, 1-y, -z #5: 2-x, 1-y, -z #6: -x, 1-y, 1-z #7: 1-x, 2-y, -z; for complex 2: #2: -x+1, -y+1, -z+1 #3: -x+1, -y+1, -z #4: x, y, z+1 #5: x+1, y, z #6: -x+1, -y, -z+1; for complex 3: #2: -x+1, -y+2, -z+2 #3: -x+2, -y+2, -z+1 #4: -x+1, -y+1,



-z+1 #5: 1-x, 2-y, 1-z; for complex **4**: #2: -x+1, -y+1, -z+1 #3: x+1, y, z #4: -x+1, -y+1, -z+2 #5: -x+1, -y+2, -z+1; for complex **5**: #2: -x+1, -y+2, -z+1; for complex **6**: #2: x-1, y+1, z+1 #3: x, y+1, z #4: -x+1, -y, -z+1; for complex **7**: #2: 1+x, y, 1+z #3: x, y, 1+z #4: 1-x, 1-y, 1-z; for complex **8**: #2: 1/2-x, y-1/2, 1/2-z #3: 1/2-x, y+1/2, 3/2-z; for complex **9**: #2: 1/2-x, y-1/2, 1/2-z #3: 1/2-x, y+1/2, 3/2-z; for complex **10**: #2: -x, 1-y, -z #3: 1-x, -y, -z.

**Table S5** Detailed attribution of IR ( $\text{cm}^{-1}$ ) for complexes **6**, **7**, **8** and ligands

| complex                        | <b>6</b>    | <b>7</b>    | <b>8</b>    | IBA         | phen    |
|--------------------------------|-------------|-------------|-------------|-------------|---------|
| $\nu_{\text{N-H}}$             | 3407        | 3406        | 3416        | 3393        | —       |
| $\nu_{\text{Ar-H}}$            | 3057        | 3057        | 3048        | 3037        | 3060    |
| $\nu_{\text{-(CH}_2\text{)-}}$ | 2930,2869   | 2929,2869   | 2947,2826   | 2911,2874   | —       |
| $\nu_{\text{asCOO-}}$          | 1586        | 1586        | 1579        | 1696        | —       |
| $\nu_{\text{sCOO-}}$           | 1429        | 1425        | 1426        | 1456        | —       |
| $\nu_{\text{C=N}}$             | 1516        | 1518        | 1516        | 1554        | 1586    |
| $\nu_{\text{C=C}}$             | 1496        | 1496        | 1492        | 1488        | 1504    |
| $\nu_{\text{NO}_3^-}$          | 1385        | 1385        | —           | —           | —       |
| $\nu_{\text{C-C}}$             | 1190        | 1190        | 1195        | 1163        | 1138    |
| $\nu_{\text{C-N}}$             | 1102        | 1102        | 1099        | 1090        | 1090    |
| $\nu_{\text{C-O}}$             | 1029        | 1030        | 1031        | 1031        | —       |
| $\delta_{\text{Ar-H}}$         | 845,746,731 | 843,746,727 | 864,773,746 | 842,763,741 | 835-739 |
| $\nu_{\text{Ln-O}}$            | 429         | 429         | 421         | —           | —       |

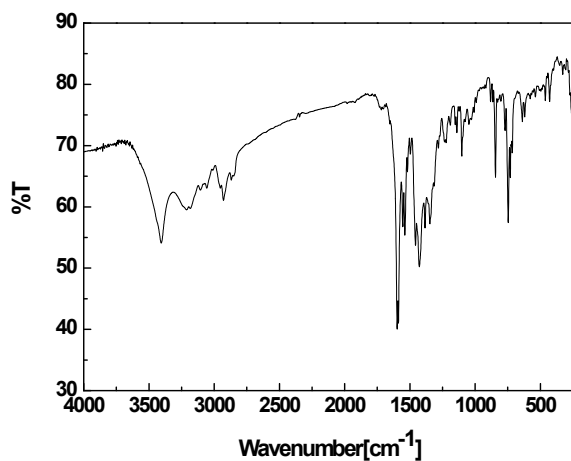

Fig S1 The IR spectrum of complex **1**

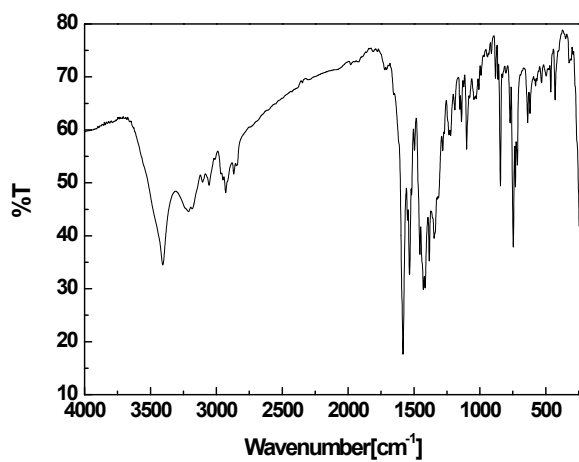

Fig S2 The IR spectrum of complex 2

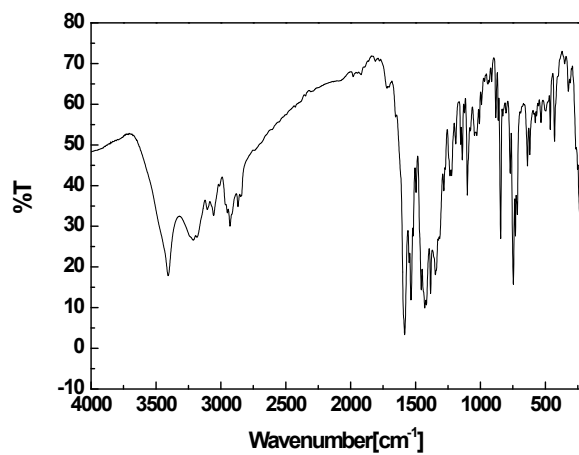

Fig S3 The IR spectrum of complex 3

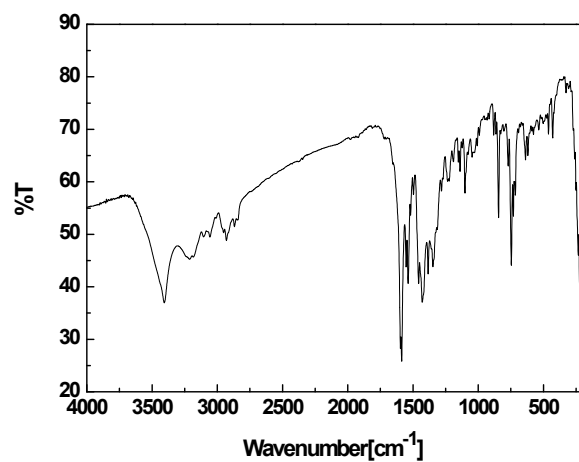

Fig S4 The IR spectrum of complex 4

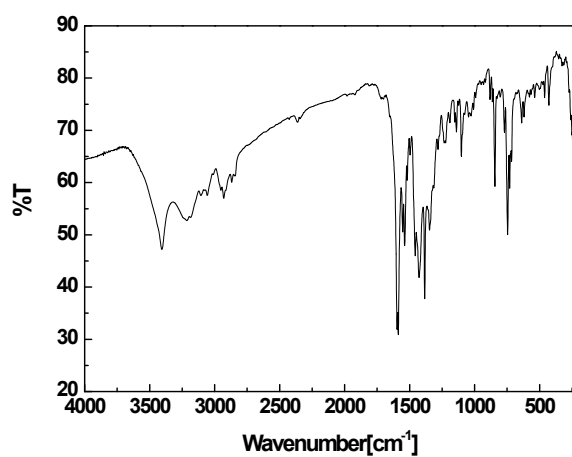

Fig S5 The IR spectrum of complex 5

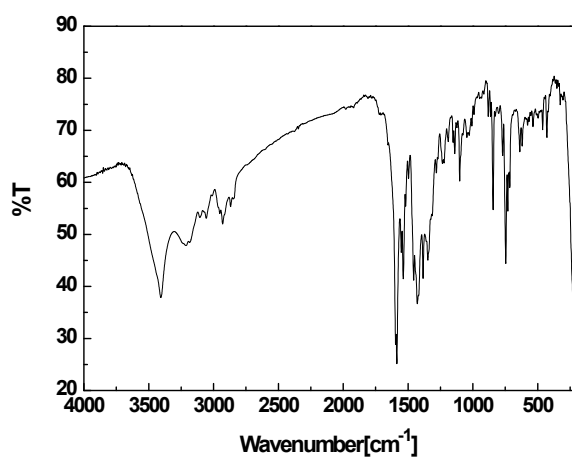

Fig S6 The IR spectrum of complex 6

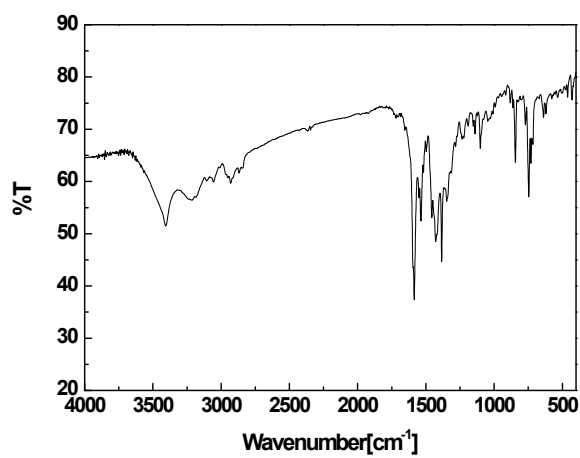

Fig S7 The IR spectrum of complex 7

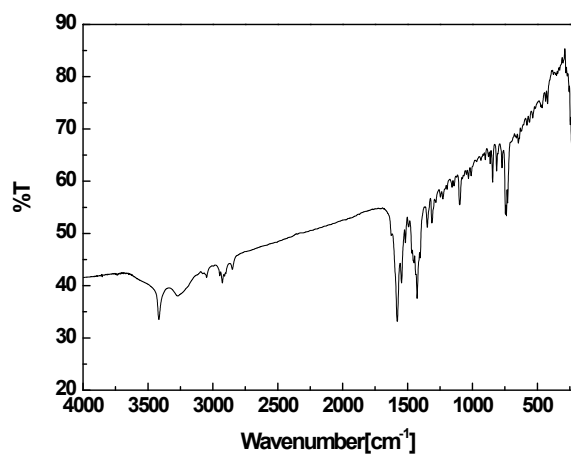

Fig S8 The IR spectrum of complex **8**

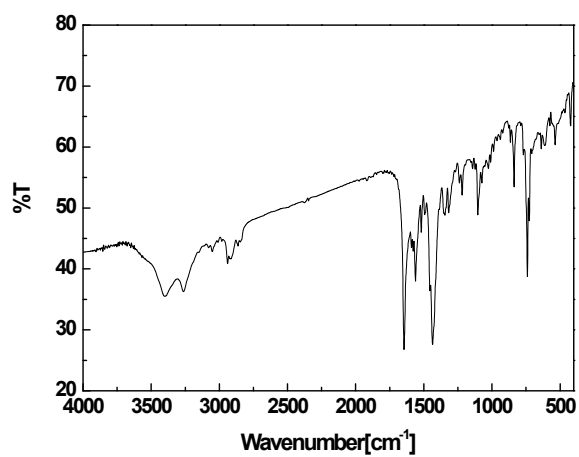

Fig S9 The IR spectrum of complex **9**

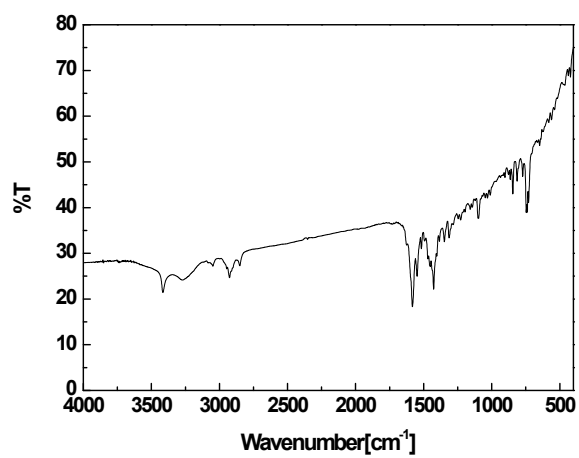

Fig S10 The IR spectrum of complex **10**

**Table S6** The UV-vis spectra assignments of complexes **1-10**

| complex   | $\lambda$ / nm                            | $\lambda$ / nm                             | $\lambda$ / nm                            | $\lambda$ / nm                            |
|-----------|-------------------------------------------|--------------------------------------------|-------------------------------------------|-------------------------------------------|
| <b>1</b>  | 448(absorption of IBA)                    | 258, 214( $\pi \rightarrow \pi^*$ )        |                                           |                                           |
| <b>2</b>  | 1590( $^3H_4 \rightarrow ^3F_3$ )         | 1478( $^3H_4 \rightarrow ^3F_4$ )          | 1104( $^3H_1 \rightarrow ^3G_4$ )         | 590( $^3H_4 \rightarrow ^3D_2$ )          |
|           | 462( $^3H_4 \rightarrow ^3P_1$ )          | 448( $^3H_4 \rightarrow ^3P_2$ )           | 260, 214( $\pi \rightarrow \pi^*$ )       |                                           |
| <b>3</b>  | 462(absorption of IBA)                    | 260, 218( $\pi \rightarrow \pi^*$ )        |                                           |                                           |
| <b>4</b>  | 433(absorption of IBA)                    | 293, 217( $\pi \rightarrow \pi^*$ )        |                                           |                                           |
| <b>5</b>  | 458(absorption of IBA)                    | 262, 214( $\pi \rightarrow \pi^*$ )        |                                           |                                           |
| <b>6</b>  | 964( $^2F_{5/2} \rightarrow ^2F_{7/2}$ )  | 448(absorption of IBA)                     | 260, 214( $\pi \rightarrow \pi^*$ )       |                                           |
| <b>7</b>  | 1668( $^6H_{5/2} \rightarrow ^6F_{1/2}$ ) | 1579( $^6H_{5/2} \rightarrow ^6H_{15/2}$ ) | 1517( $^6H_{5/2} \rightarrow ^6F_{3/2}$ ) | 1401( $^6H_{5/2} \rightarrow ^6F_{5/2}$ ) |
|           | 1249( $^6H_{5/2} \rightarrow ^6F_{7/2}$ ) | 1089( $^6H_{5/2} \rightarrow ^6F_{9/2}$ )  | 946( $^6H_{5/2} \rightarrow ^6F_{11/2}$ ) | 427( $^6H_{5/2} \rightarrow ^4F_{7/2}$ )  |
|           | 309, 264, 216( $\pi \rightarrow \pi^*$ )  |                                            |                                           |                                           |
| <b>8</b>  | 350( $\pi \rightarrow \pi^*$ )            |                                            |                                           |                                           |
| <b>9</b>  | 460(absorption of IBA)                    | 263, 214( $\pi \rightarrow \pi^*$ )        |                                           |                                           |
| <b>10</b> | 964( $^2F_{5/2} \rightarrow ^2F_{7/2}$ )  | 354, 260, 214( $\pi \rightarrow \pi^*$ )   |                                           |                                           |

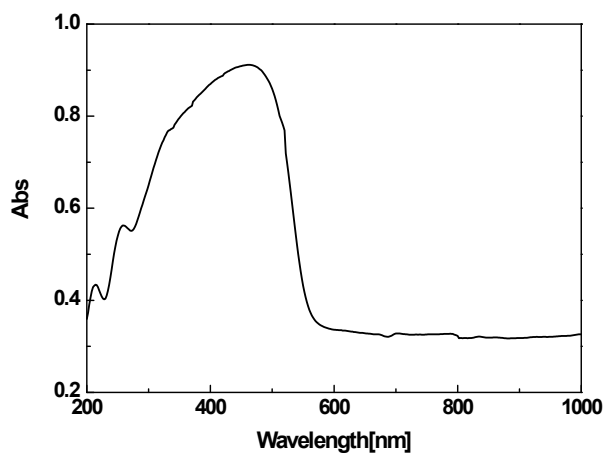Fig S11 The UV-vis spectrum of complex **1**

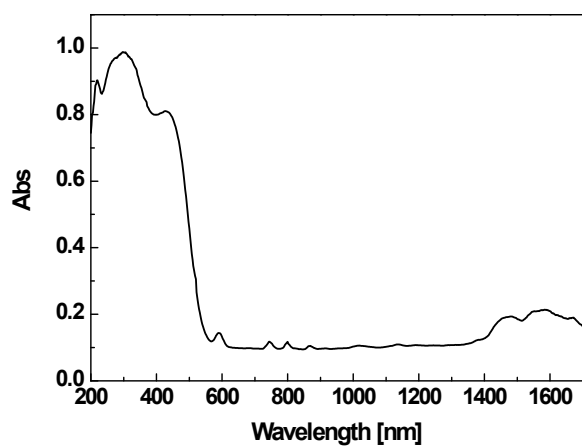

Fig S12 The UV-vis spectrum of complex 2

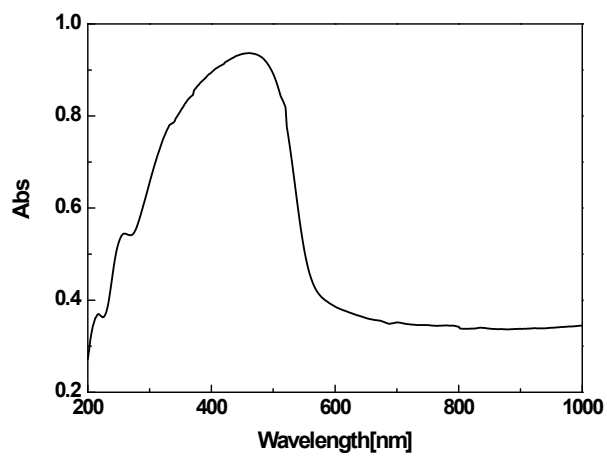

Fig S13 The UV-vis spectrum of complex 3

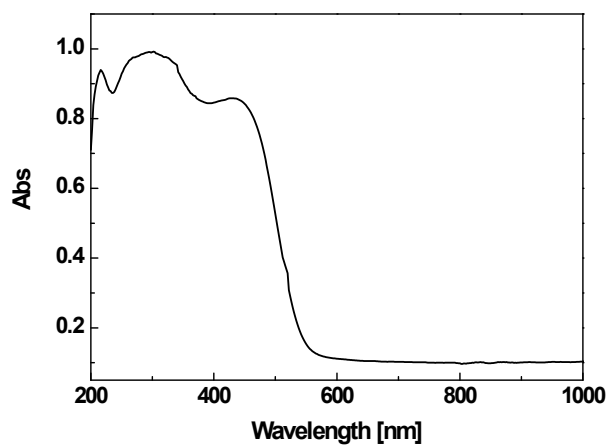

Fig S14 The UV-vis spectrum of complex 4

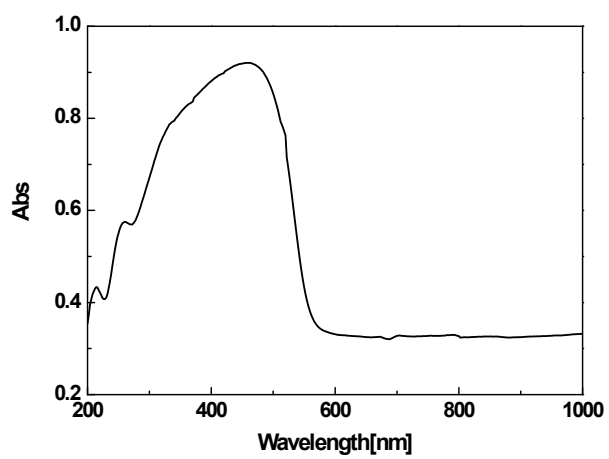

Fig S15 The UV-vis spectrum of complex 5

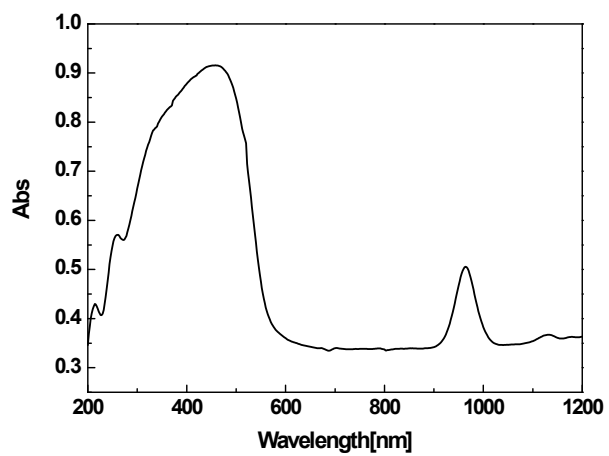

Fig S16 The UV-vis spectrum of complex 6

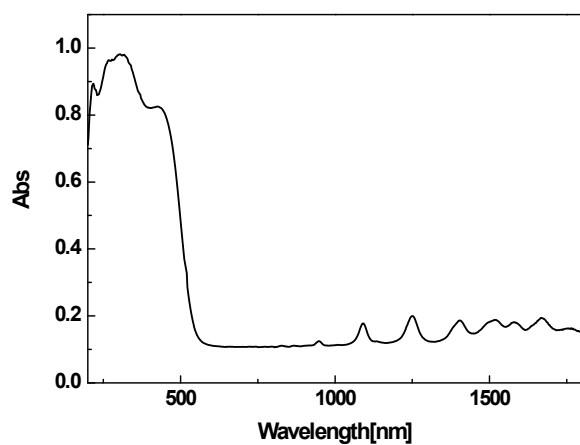

Fig S17 The UV-vis spectrum of complex 7

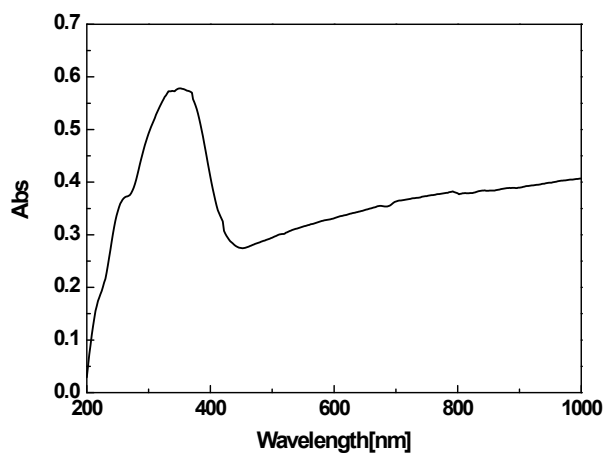

Fig S18 The UV-vis spectrum of complex 8

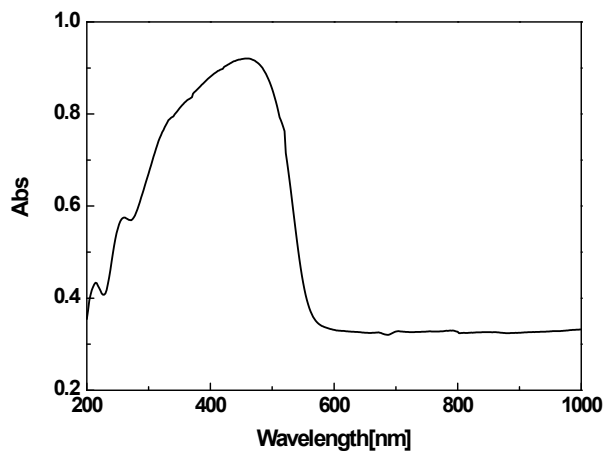

Fig S19 The UV-vis spectrum of complex 9

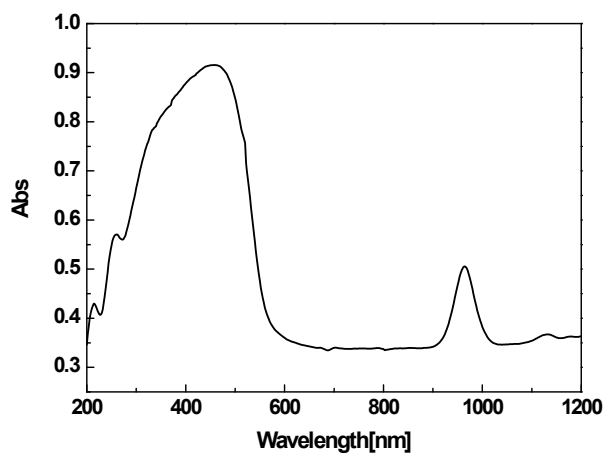

Fig S20 The UV-vis spectrum of complex 10



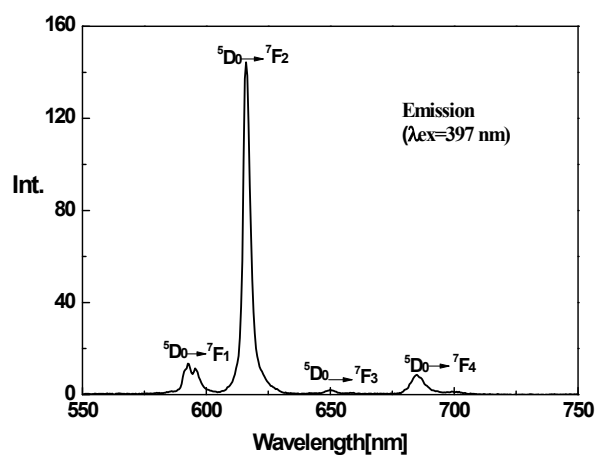

Fig. S21 Room-temperature solid-state photoluminescence spectrum of complex 3

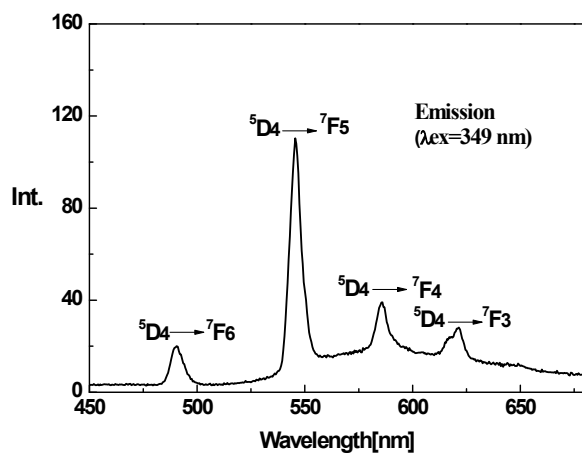

Fig. S22 Room-temperature solid-state photoluminescence spectrum of complex 5

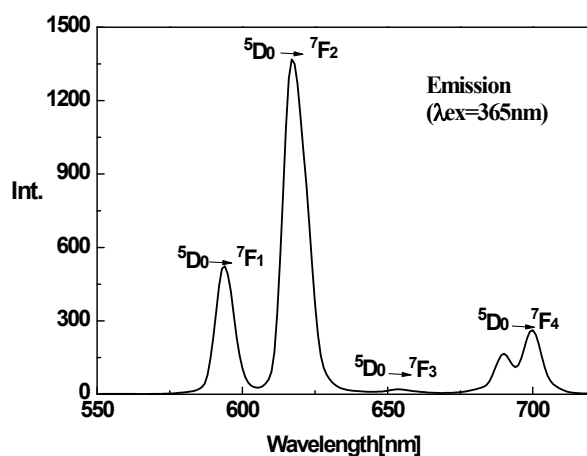

Fig. S23 Room-temperature solid-state photoluminescence spectrum of complex 8

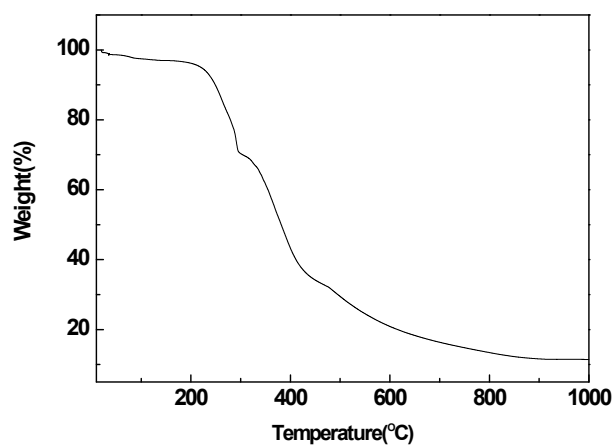

Fig S24 The TG curve of complex 1

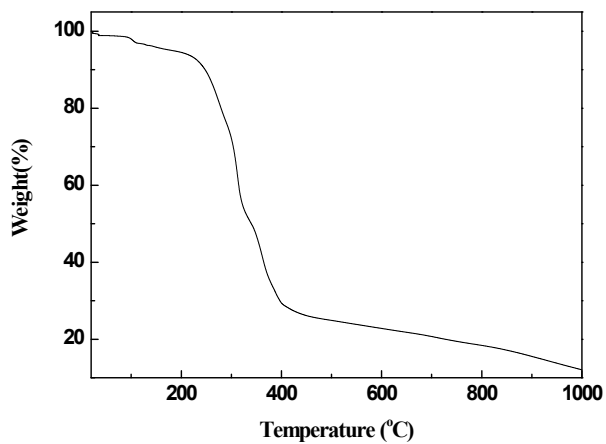

Fig S25 The TG curve of complex 2

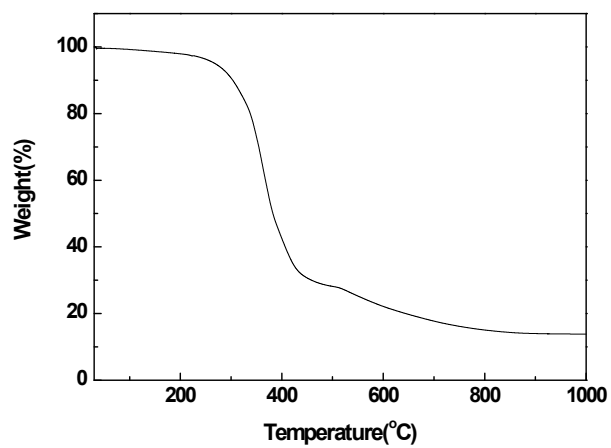

Fig S26 The TG curve of complex 3

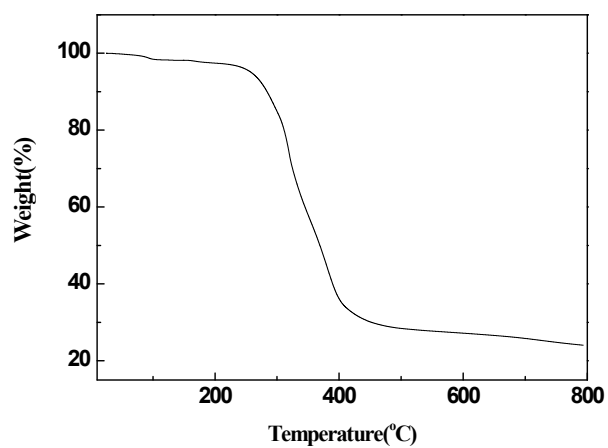

Fig S27 The TG curve of complex 4

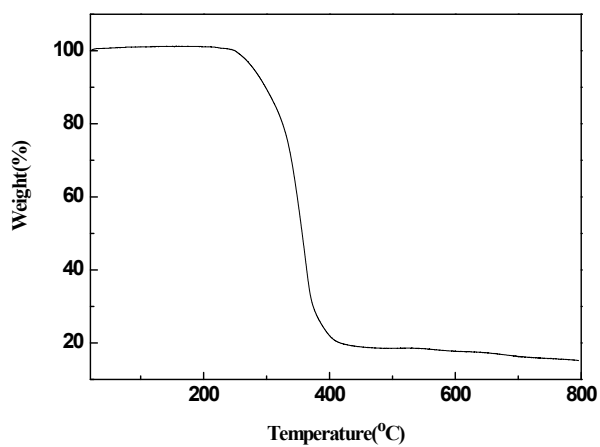

Fig S28 The TG curve of complex 5

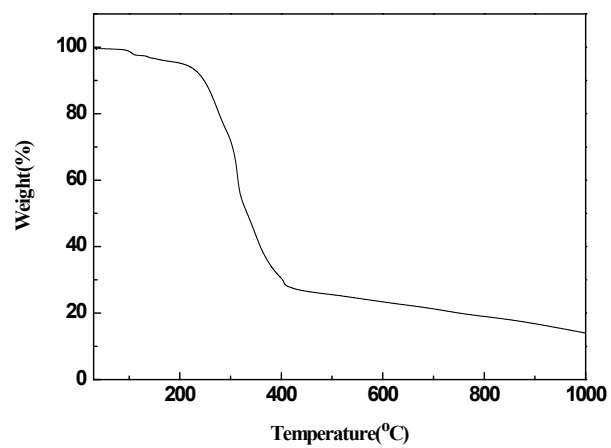

Fig S29 The TG curve of complex 6

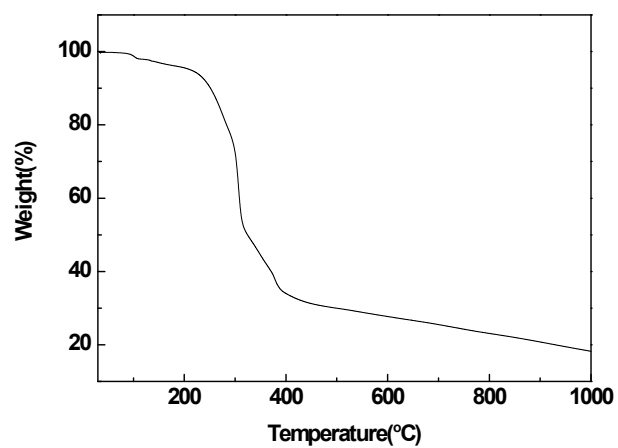

Fig S30 The TG curve of complex 7

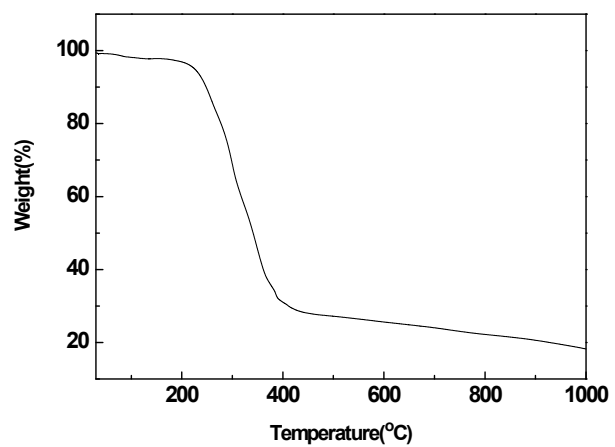

Fig S31 The TG curve of complex 8

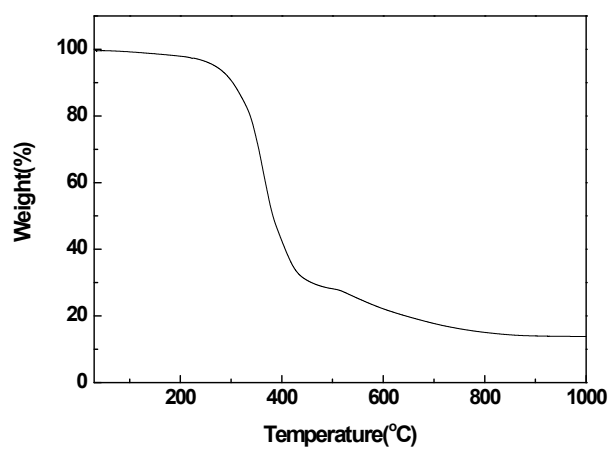

Fig S32 The TG curve of complex 9

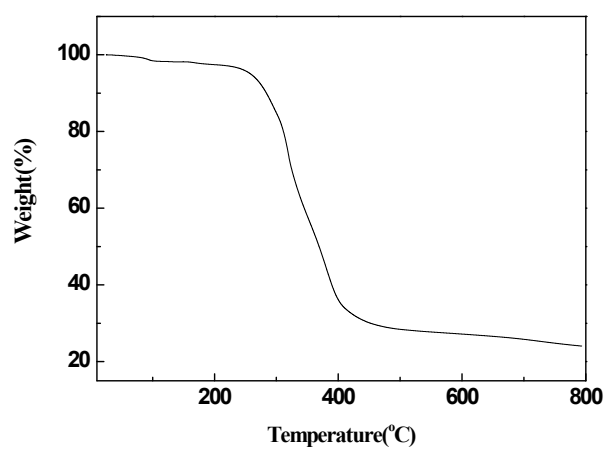

Fig S33 The TG curve of complex 10

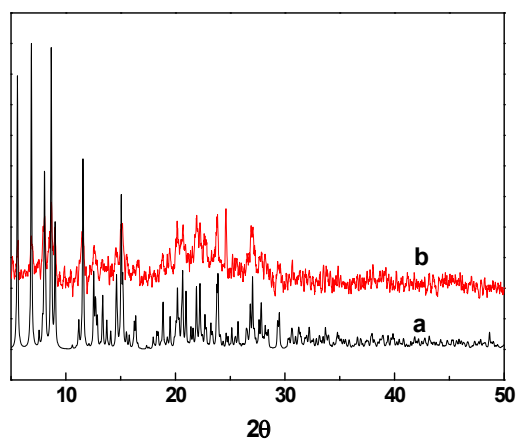

Fig S34 The simulated PXRD pattern (a) and measured PXRD spectrum (b) of complex 1

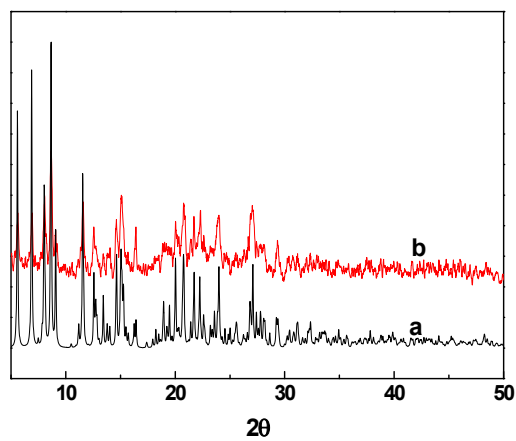

Fig S35 The simulated PXRD pattern (a) and measured PXRD spectrum (b) of complex 2

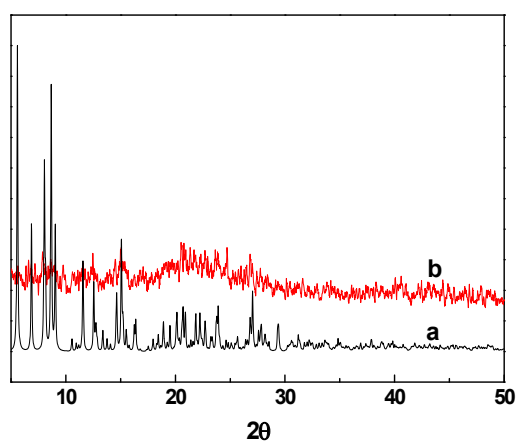

Fig S36 The simulated PXRD pattern (a) and measured PXRD spectrum (b) of complex 3

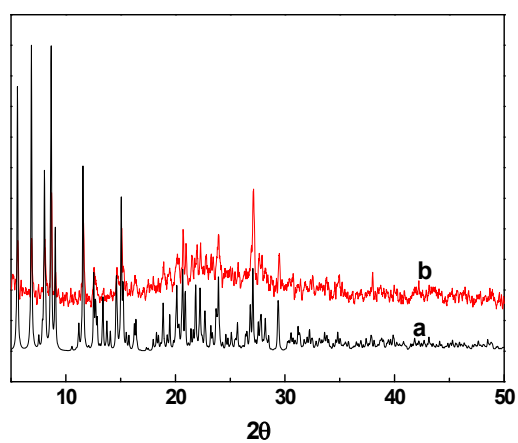

Fig S37 The simulated PXRD pattern (a) and measured PXRD spectrum (b) of complex 4

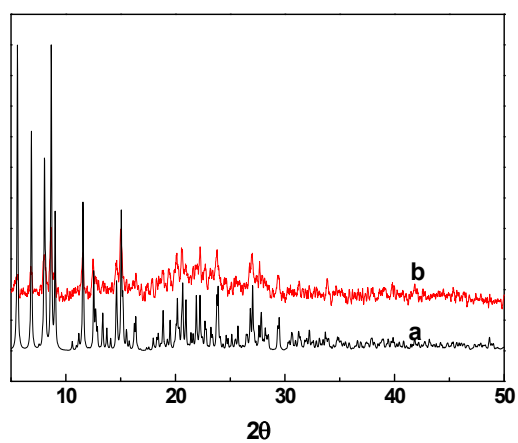

Fig S38 The simulated PXRD pattern (a) and measured PXRD spectrum (b) of complex 5

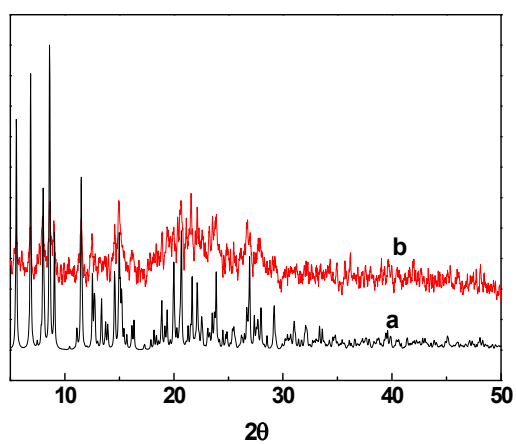

Fig S39 The simulated PXRD pattern (a) and measured PXRD spectrum (b) of complex 6

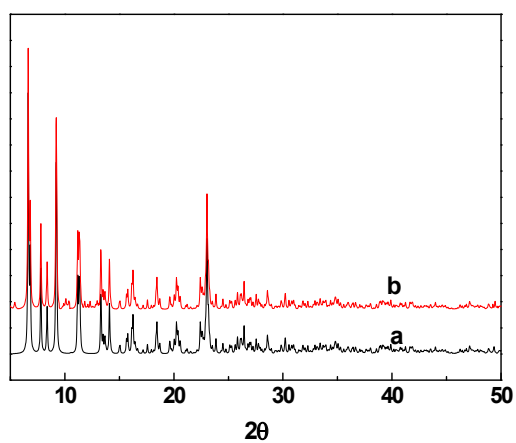

Fig S40 The simulated PXRD pattern (a) and measured PXRD spectrum (b) of complex 7

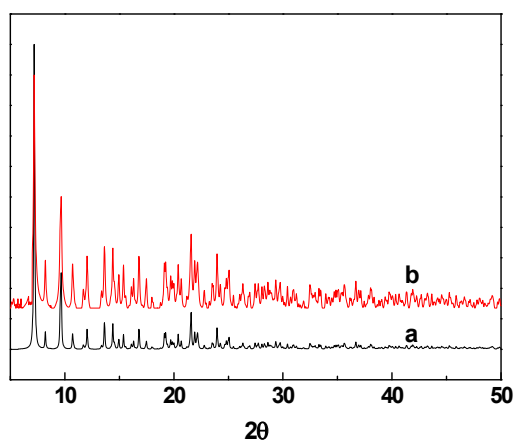

Fig S41 The simulated PXRD pattern (a) and measured PXRD spectrum (b) of complex 8

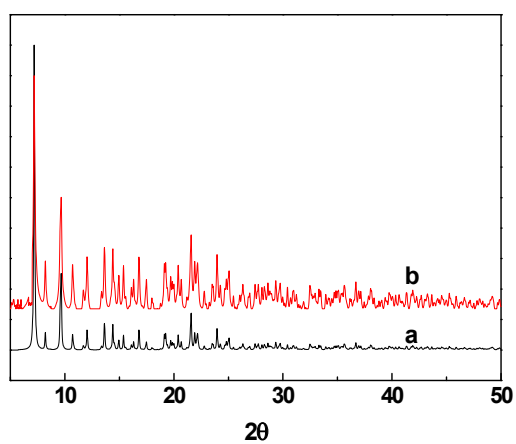

Fig S42 The simulated PXR D pattern (a) and measured PXR D spectrum (b) of complex 9

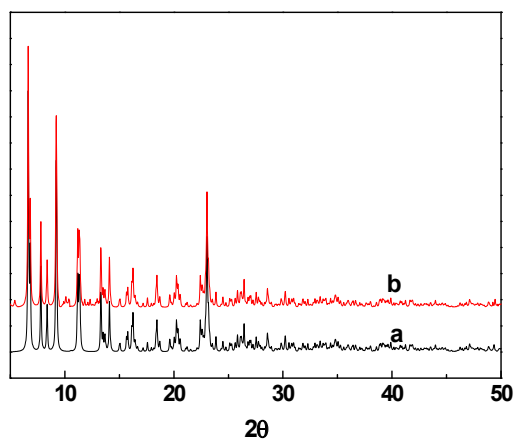

Fig S43 The simulated PXR D pattern (a) and measured PXR D spectrum (b) of complex 10

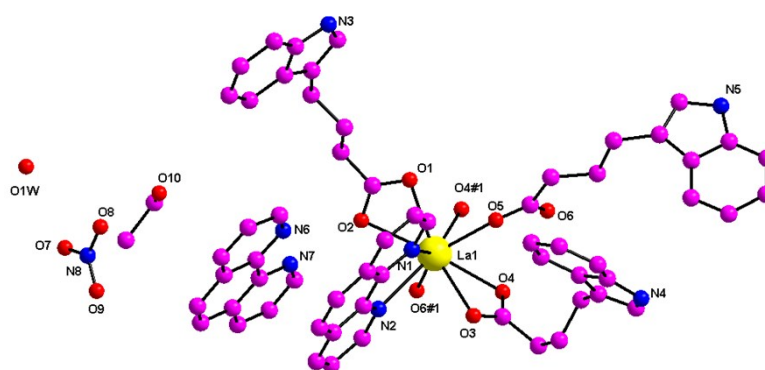

Fig S44 The unit structure of complex 1(symmetry codes: #1 -x,-y+1,-z+2)



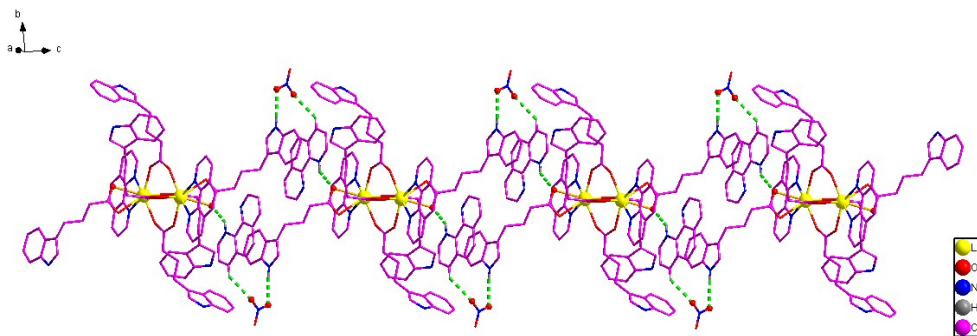

Fig S45 The 1D chain structure connected by hydrogen bonds of complex 1

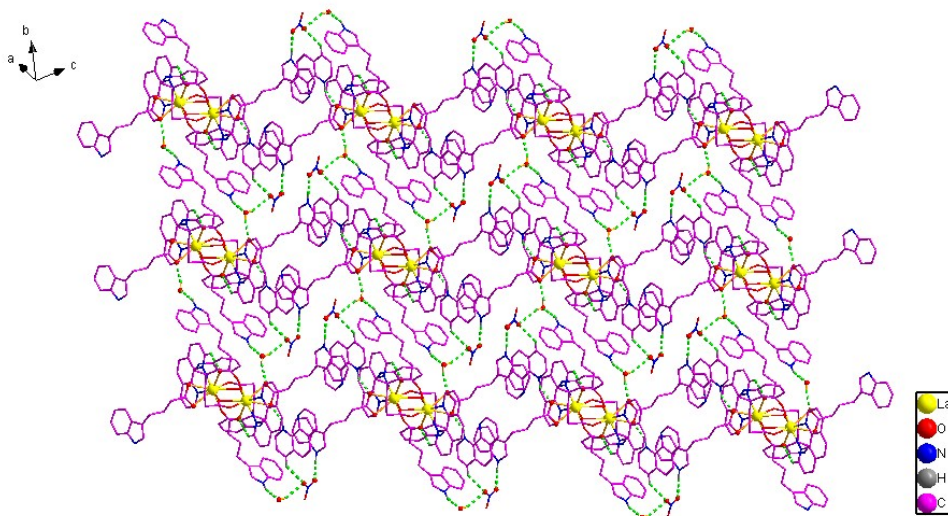

Fig S46 The 2D sheet structure connected by hydrogen bonds of complex 1

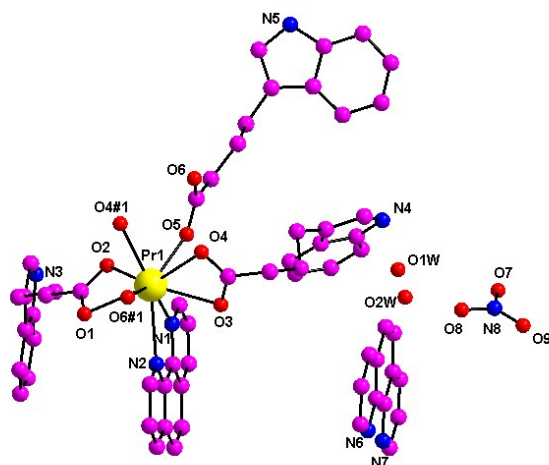

Fig S47 The unit structure of complex 2(symmetry codes: #1 -x+2,-y,-z+1)

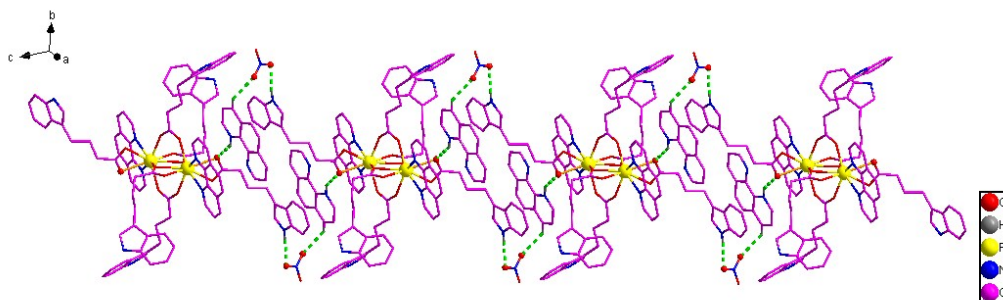

Fig S48 The 1D chain structure connected by hydrogen bonds of complex 2

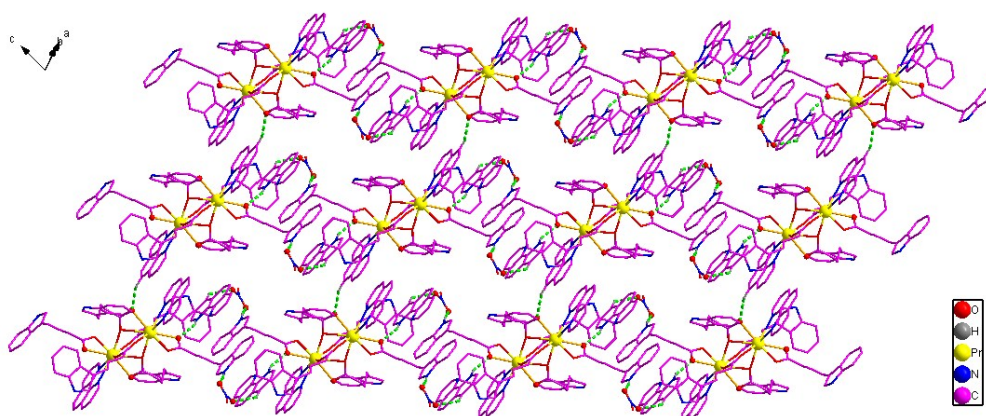

Fig S49 The 2D sheet structure connected by hydrogen bonds of complex 2

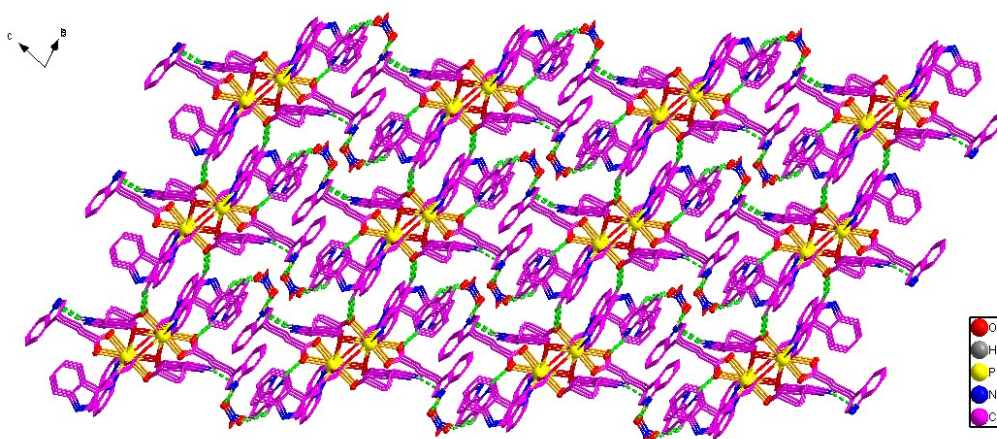

Fig S50 The 3D network structure connected by hydrogen bonds of complex 2

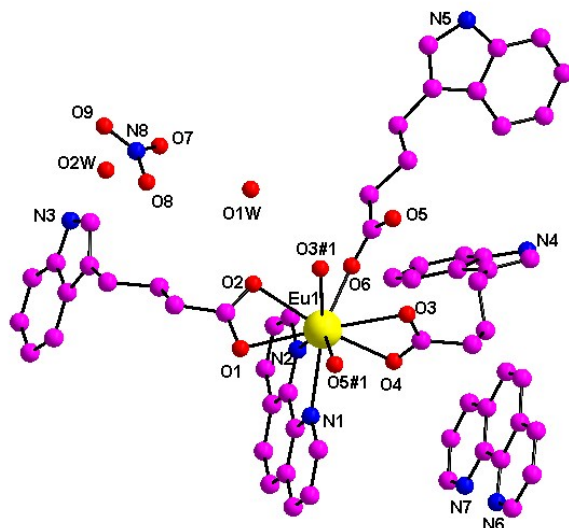

Fig S51 The unit structure of complex **3** (symmetry codes: #1:  $-x+2, -y+1, -z+1$ )

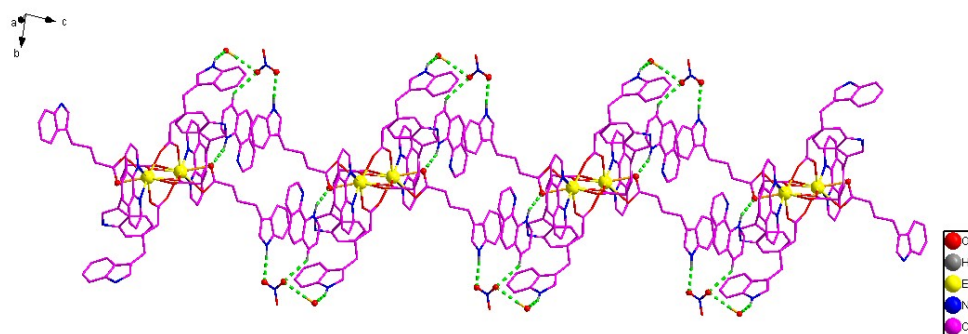

Fig S52 The 1D chain structure connected by hydrogen bonds of complex **3**

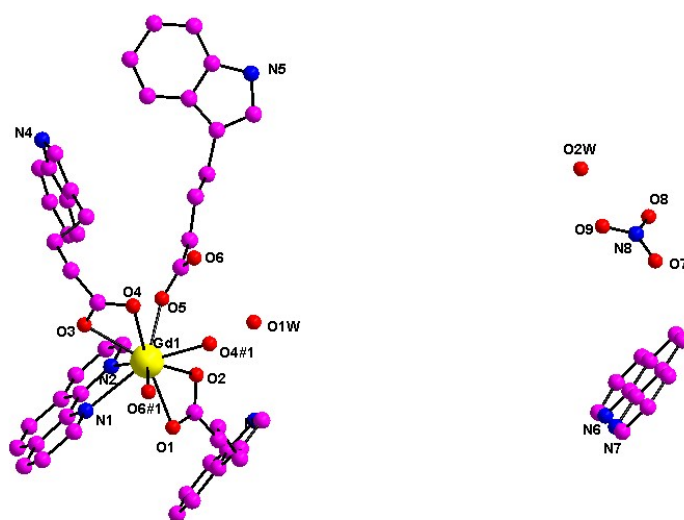

Fig S53 The unit structure of complex **4** (symmetry codes: #1:  $2-x, 2-y, -z$ )

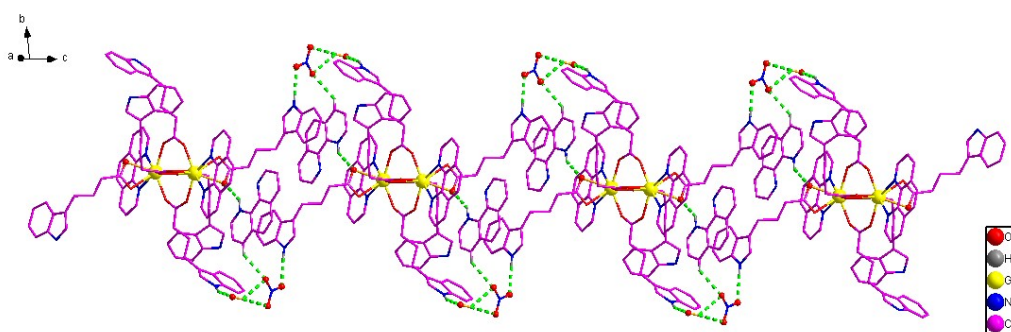

Fig S54 The 1D chain structure connected by hydrogen bonds of complex 4

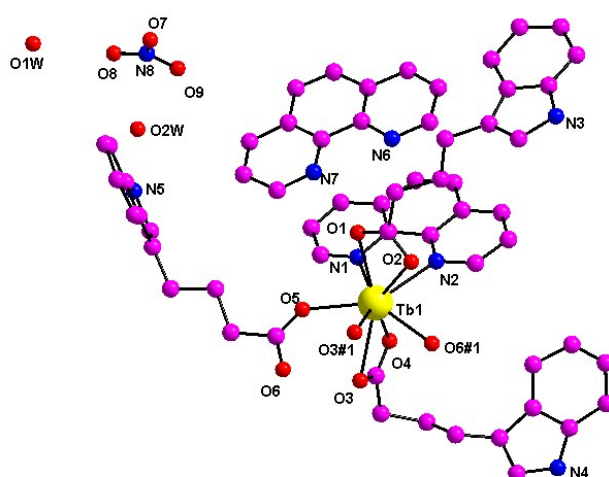

Fig S55 The unit structure of complex 5 (symmetry codes: #1: 1-x, 1-y, 1-z)

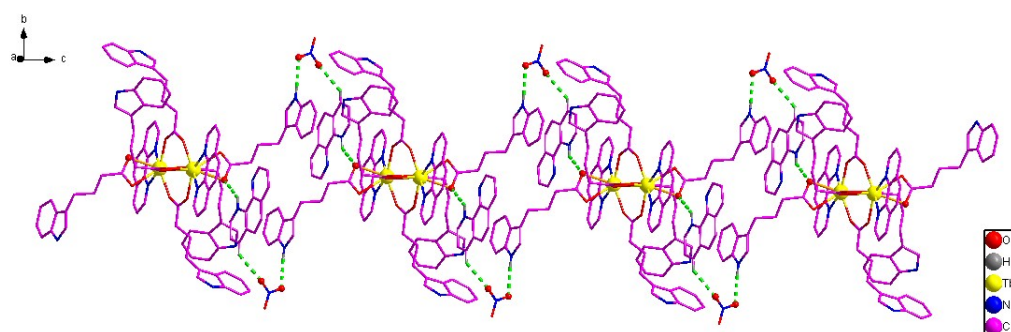

Fig S56 The 1D chain structure connected by hydrogen bonds of complex 5



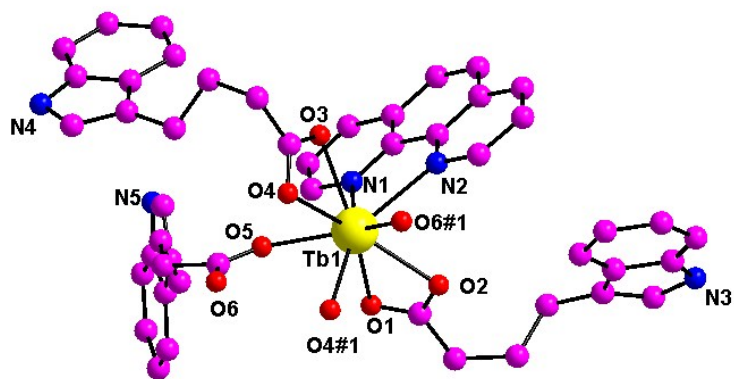

Fig S57 The unit structure of complex **9** (symmetry codes: #1: 1-x, 1-y, 1-z)

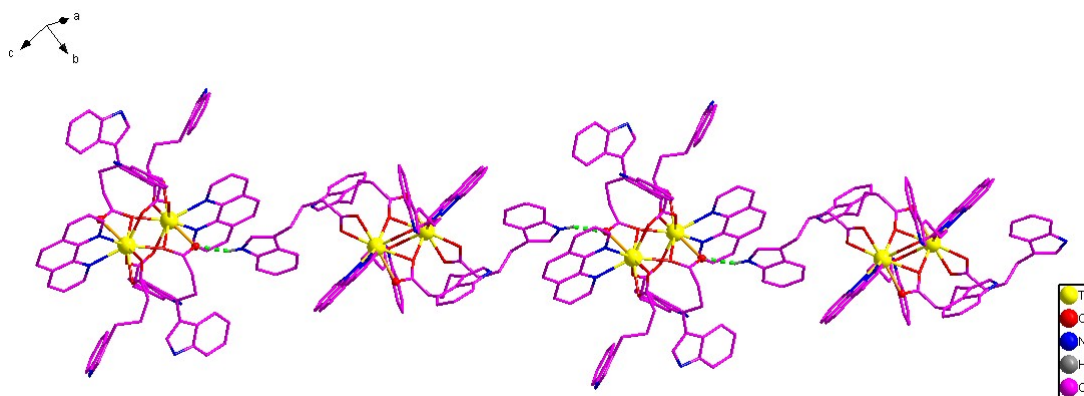

Fig S58 The 1D chain structure connected by hydrogen bonds of complex **9**

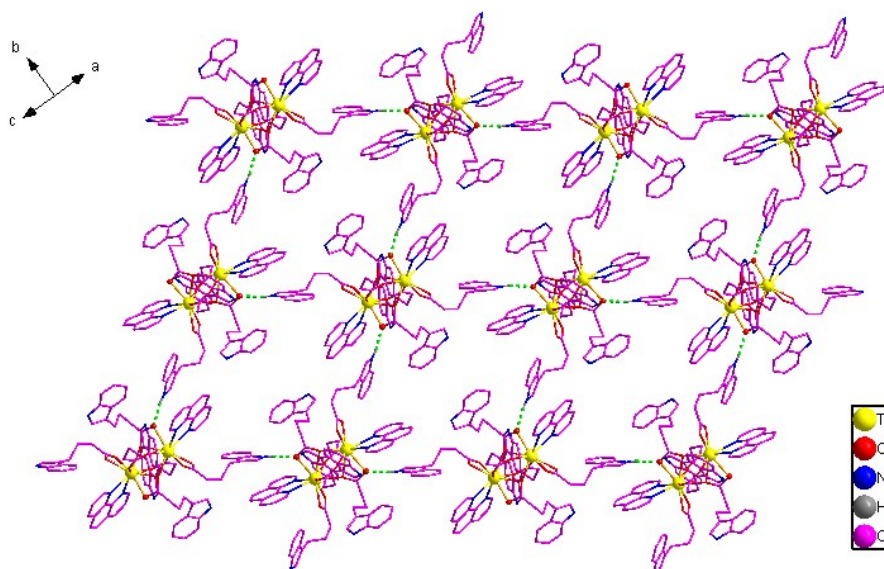

Fig S59 The 2D sheet structure connected by hydrogen bonds of complex **9**

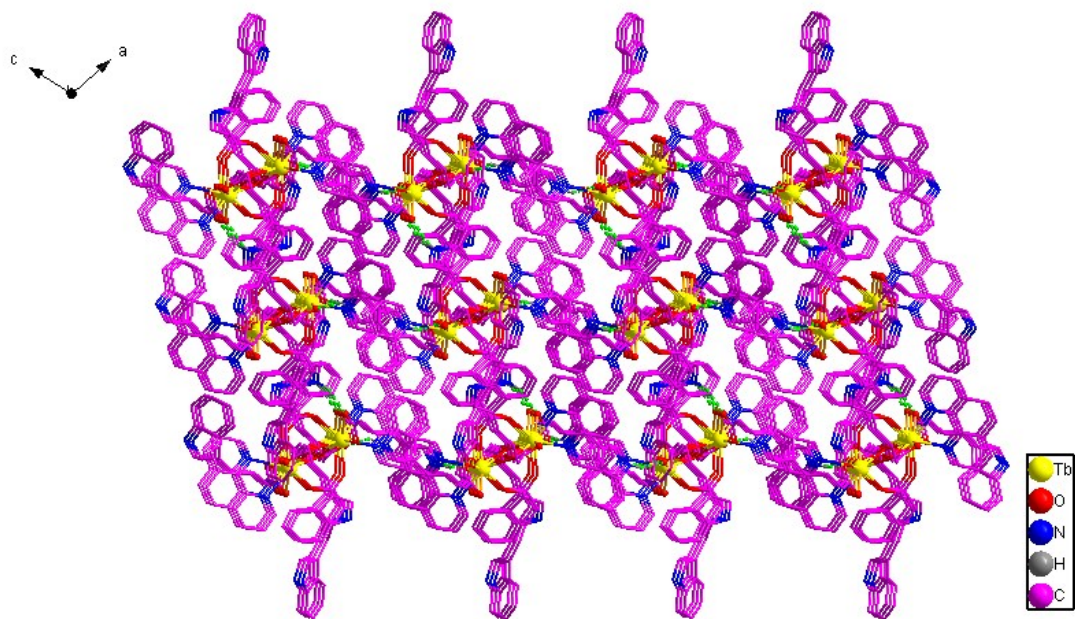

Fig S60 The 3D network structure connected by hydrogen bonds of complex 9

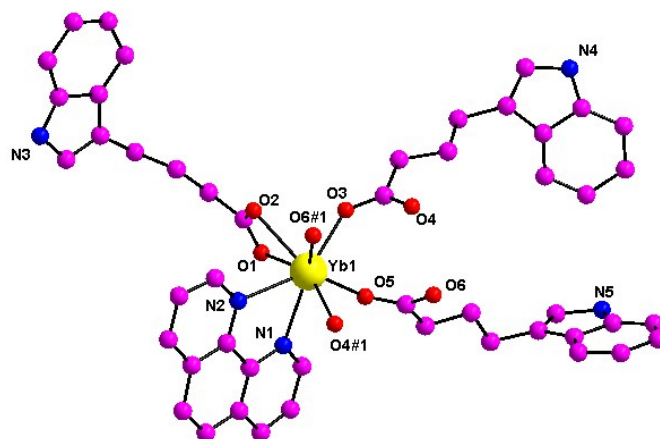

Fig S61 The unit structure of complex 10(symmetry codes: #1: 1-x, 1-y, -z)

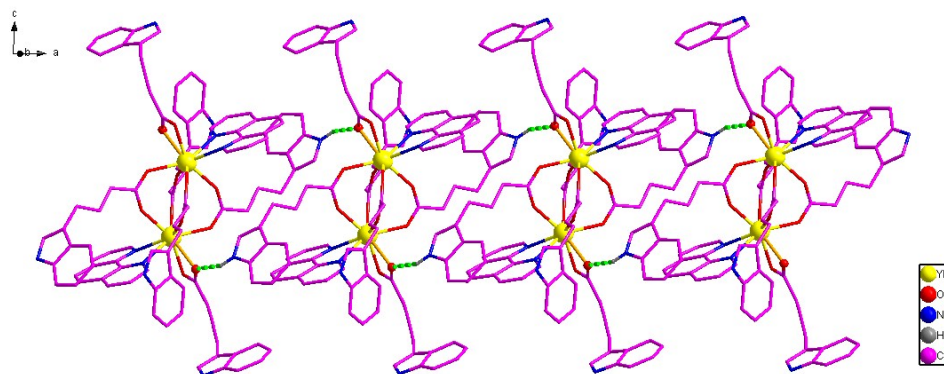

Fig S62 The 1D chain structure connected by hydrogen bonds of complex 10

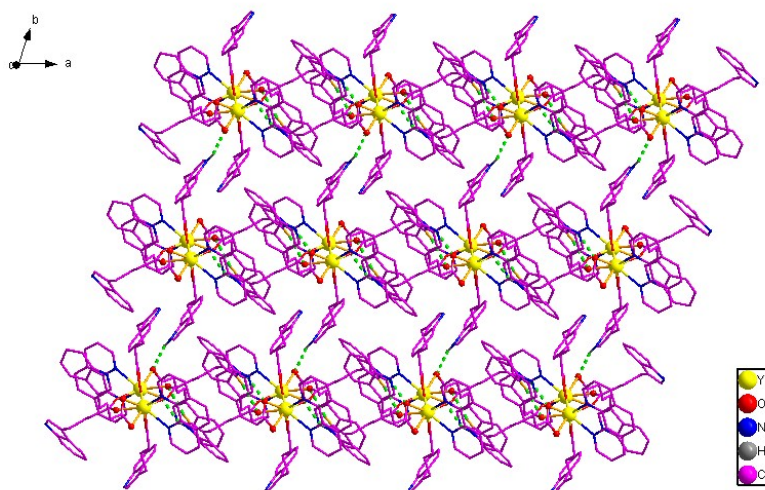

Fig S63 The 2D sheet structure connected by hydrogen bonds of complex **10**

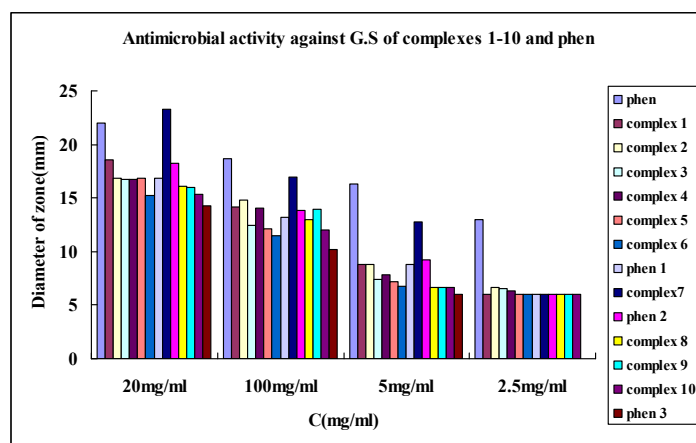

Fig S64 Antimicrobial activity against G. S of complexes 1-10 and phen (**phen 1**: 6.15 mg/ml, 3.08 mg/ml, 1.54 mg/ml, 0.77 mg/ml; **phen 2**: 7.34 mg/ml, 3.67 mg/ml, 1.84 mg/ml, 0.92 mg/ml; **phen 3**: 3.83 mg/ml, 1.92 mg/ml, 0.96 mg/ml, 0.48 mg/ml)

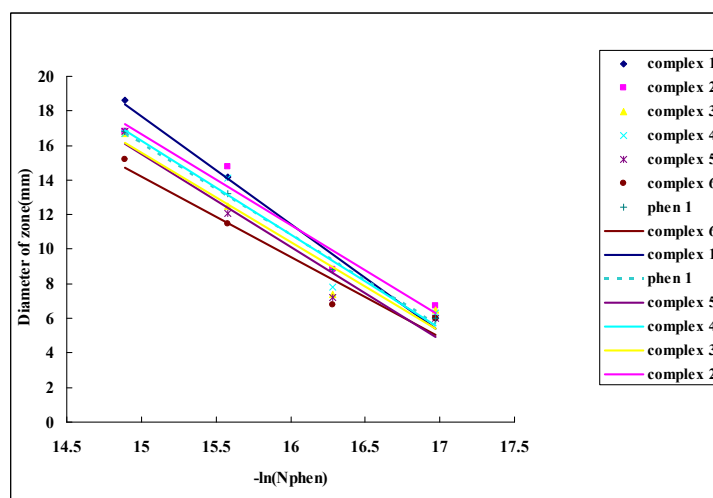

Fig S65 The associations of the diameters of the inhibition zones with relative amounts of phen against G. S

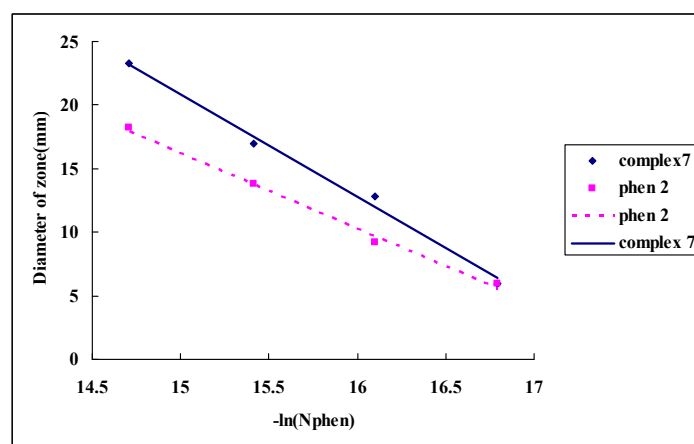

Fig S66 The associations of the diameters of the inhibition zones with relative amounts of phen against G. S

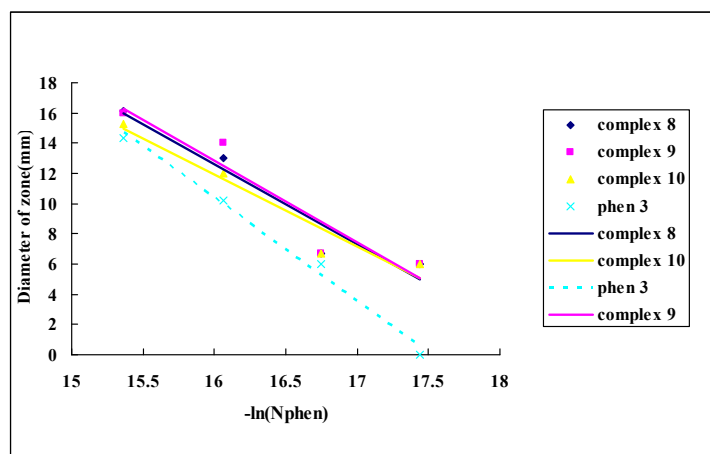

Fig S67 The associations of the diameters of the inhibition zones with relative amounts of phen against G. S

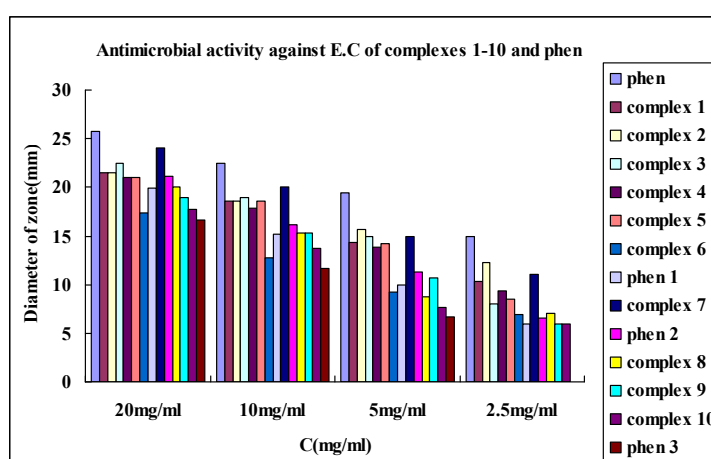

Fig S68 Antimicrobial activity against E. C of complexes 1-10 and phen (**phen 1**: 6.15 mg/ml, 3.08 mg/ml, 1.54 mg/ml, 0.77 mg/ml; **phen 2**: 7.34 mg/ml, 3.67 mg/ml, 1.84 mg/ml, 0.92 mg/ml; **phen 3**: 3.83 mg/ml, 1.92 mg/ml, 0.96 mg/ml, 0.48 mg/ml)



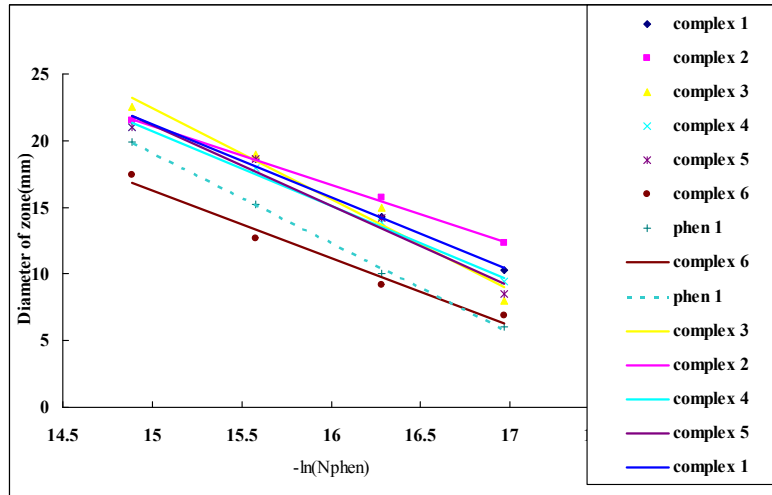

Fig S69 The associations of the diameters of the inhibition zones with relative amounts of phen against E. C

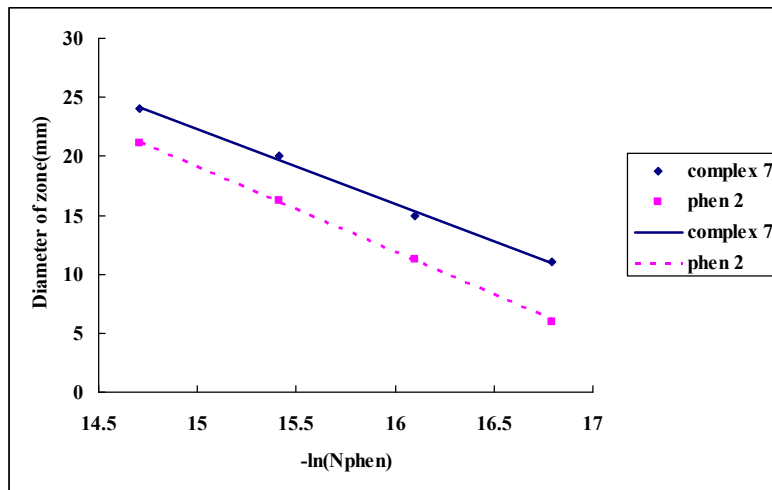

Fig S70 The associations of the diameters of the inhibition zones with relative amounts of phen against E. C

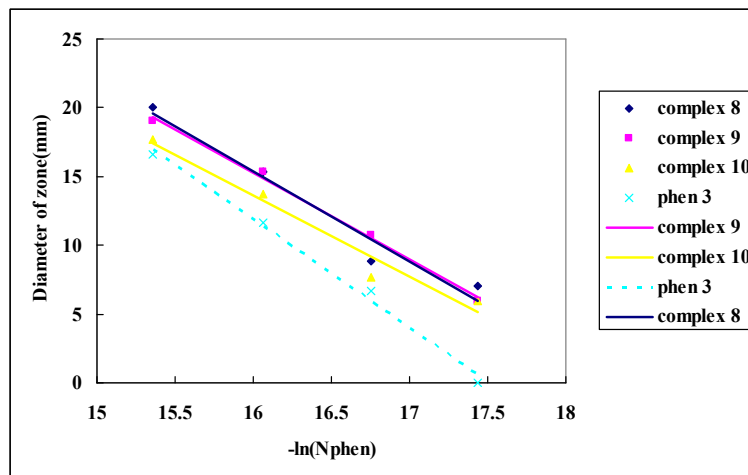

Fig S71 The associations of the diameters of the inhibition zones with relative amounts of phen against E. C

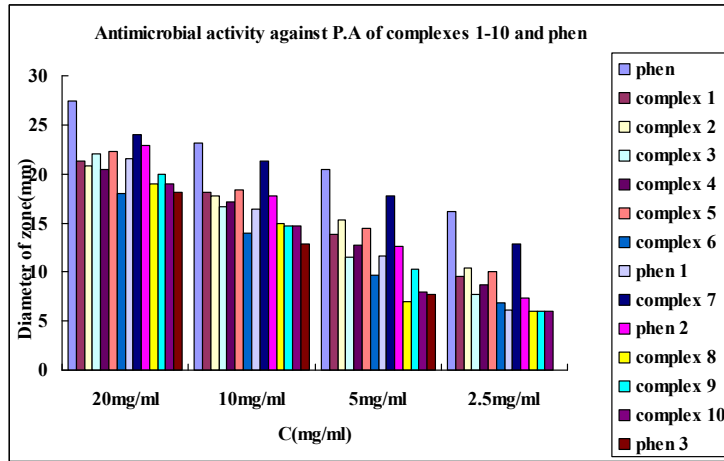

Fig S72 Antimicrobial activity against P.A. of complexes 1-10 and phen (**phen 1**: 6.15 mg/ml, 3.08 mg/ml, 1.54 mg/ml, 0.77 mg/ml; **phen 2**: 7.34 mg/ml, 3.67 mg/ml, 1.84 mg/ml, 0.92 mg/ml; **phen 3**: 3.83 mg/ml, 1.92 mg/ml, 0.96 mg/ml, 0.48 mg/ml)

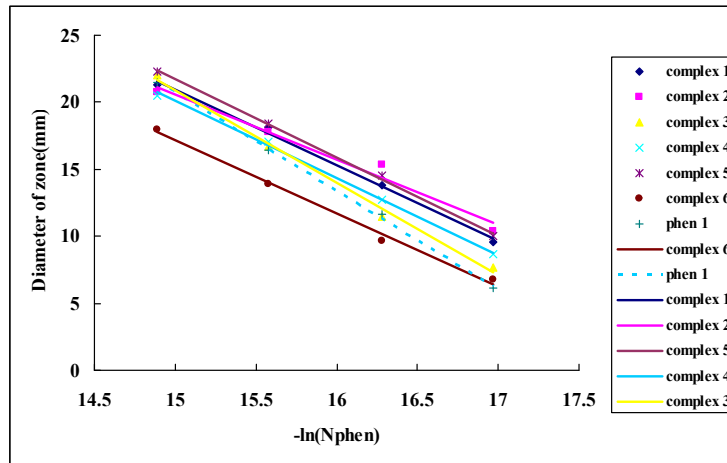

Fig S73 The associations of the diameters of the inhibition zones with relative amounts of phen against P. A

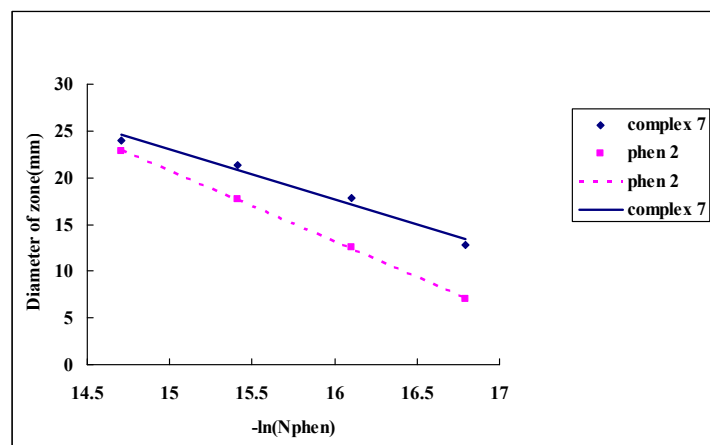

Fig S74 The associations of the diameters of the inhibition zones with relative amounts of phen against P. A

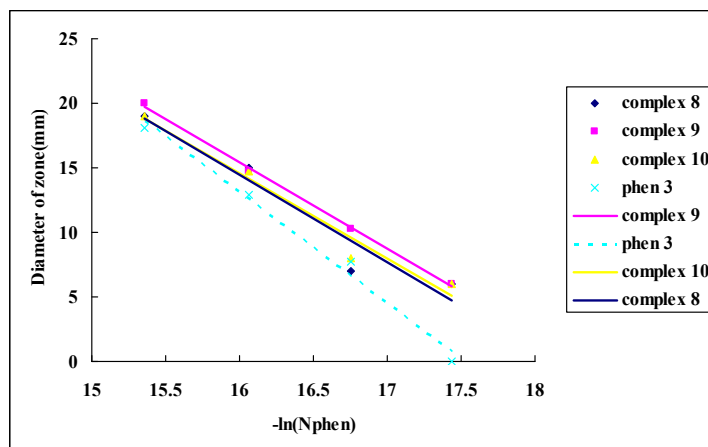

Fig S75 The associations of the diameters of the inhibition zones with relative amounts of phen against P. A

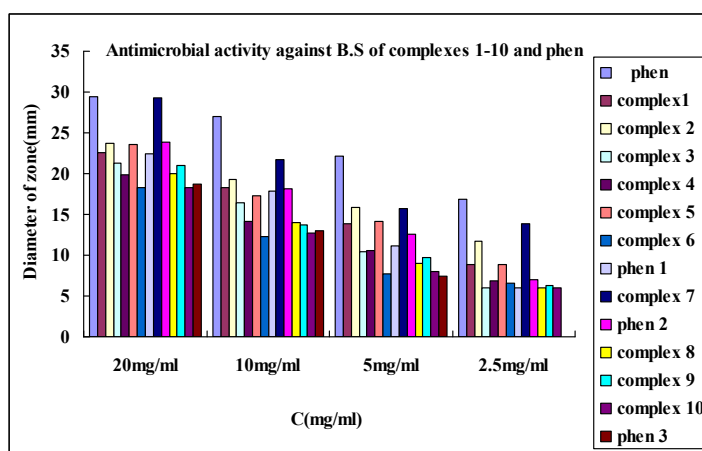

Fig S76 Antimicrobial activity against B.S of complexes 1-10 and phen (**phen 1**: 6.15 mg/ml, 3.08 mg/ml, 1.54 mg/ml, 0.77 mg/ml; **phen 2**: 7.34 mg/ml, 3.67 mg/ml, 1.84 mg/ml, 0.92 mg/ml; **phen 3**: 3.83 mg/ml, 1.92 mg/ml, 0.96 mg/ml, 0.48 mg/ml)

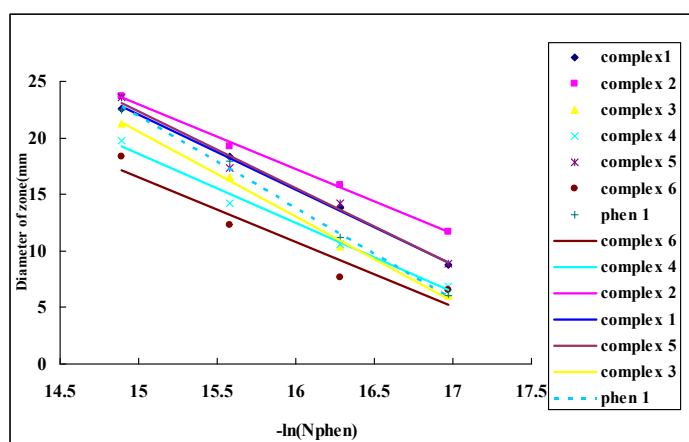

Fig S77 The associations of the diameters of the inhibition zones with relative amounts of phen against B. S

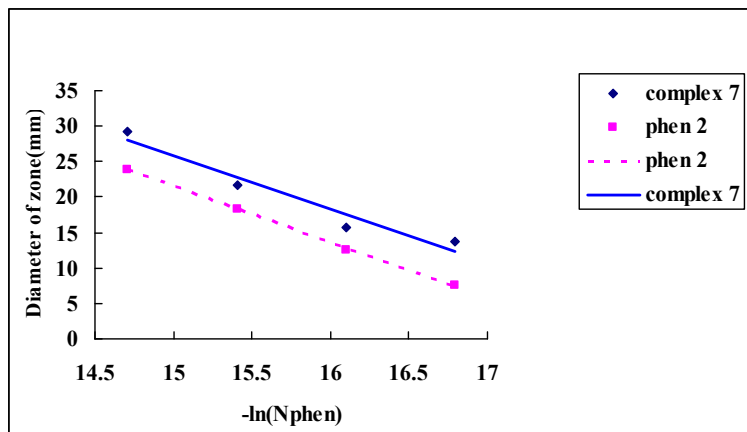

Fig S78 The associations of the diameters of the inhibition zones with relative amounts of phen against B. S

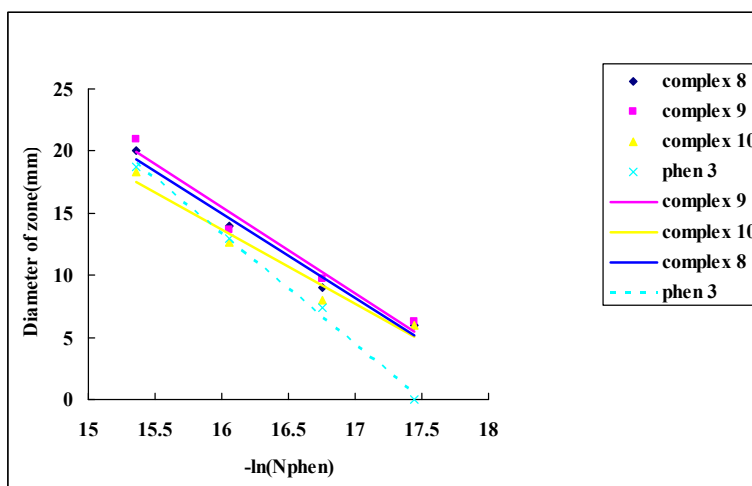

Fig S79 The associations of the diameters of the inhibition zones with relative amounts of phen against B. S
